# Supplementary material for: Unraveling innate substrate control in site-selective palladium-catalyzed C–H heterocycle functionalization
Source: PubMed Central journal article supplement — Chem Sci. 2016 Mar 8;7(6):3900–9. doi: 10.1039/c5sc04590h (PMC6013790; doi:10.1039/c5sc04590h), 2016-03-08
Supplement: SC-007-C5SC04590H-s001.pdf [file SC-007-C5SC04590H-s001.pdf]

## Supporting Information

# Unraveling Innate Substrate Control in Site-Selective Palladium-Catalyzed C-H Heterocycle Functionalization

Hwanho Choi,<sup>§</sup> Minsik Min,<sup>†,‡</sup> Qian Peng,<sup>\*§</sup> Dahye Kang<sup>†,‡</sup>, Robert S. Paton,<sup>\*§</sup>  
and Sungwoo Hong<sup>\*,‡,†</sup>

<sup>†</sup>Department of Chemistry, Korea Advanced Institute of Science and Technology (KAIST), Daejeon, Korea

<sup>‡</sup>Center for Catalytic Hydrocarbon Functionalizations, Institute for Basic Science (IBS), Daejeon, Korea

<sup>§</sup>Chemistry Research Laboratory, Department of Chemistry, University of Oxford, 12 Mansfield Road,  
Oxford OX1 3TA, U.K.

|                                                                                                |           |
|------------------------------------------------------------------------------------------------|-----------|
| <b>1. EXPERIMENT</b> .....                                                                     | <b>2</b>  |
| 1.1 SYNTHESIS OF 1-METHYLQUINOLIN-4(1H)-ONE-3-D .....                                          | <b>2</b>  |
| 1.2 General Procedure for the Kinetic isotope experiments.....                                 | 3         |
| 1.3 General Procedure for the H/D Exchange Experiments.....                                    | 4         |
| <b>2. DFT CALCULATIONS</b> .....                                                               | <b>5</b>  |
| 2.1 STATIONARY POINTS: .....                                                                   | 5         |
| 2.2 COMPUTATIONAL DETAILS .....                                                                | 5         |
| 2.2.1 Genration of grid based Potential Energy Surface (PES) of C-H arylation selectivity..... | 6         |
| 2.2.2 Calculated pathway for the reaction .....                                                | 8         |
| 2.2.3 Calculated frontier orbital and transition state structures.....                         | 9         |
| 2.3 CARTESIAN COORDINATES:.....                                                                | 10        |
| <b>3. REFERENCES</b> .....                                                                     | <b>34</b> |

# 1. EXPERIMENT

## 1.1 SYNTHESIS OF 1-METHYLQUINOLIN-4(1H)-ONE-3-D

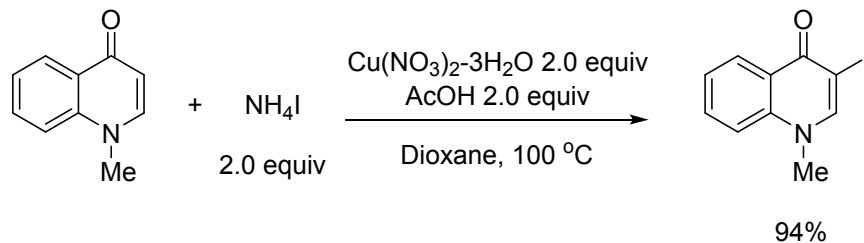

A mixture of 1-methyl-4-quinolone (1 equiv),  $\text{NH}_4\text{I}$  (2 equiv),  $\text{Cu}(\text{NO}_3)_2 \cdot 3\text{H}_2\text{O}$  (2 equiv),  $\text{AcOH}$  (2 equiv) in 1,4-dioxane was heated to  $100\text{ }^\circ\text{C}$  for 1 h. After cooled to room temperature, 1,4-dioxane was removed under vacuo. The residue was diluted with  $\text{CH}_2\text{Cl}_2$  and then added aqueous sodium thiosulfate and aqueous  $\text{NH}_4\text{Cl}$ . When the residue was changed from dark red to pale yellow, it was extracted three times with  $\text{CH}_2\text{Cl}_2$ . After removal of solvent, the residue was purified by flash chromatography on silica gel ( $\text{CH}_2\text{Cl}_2 / \text{MeOH} = 25 : 1$ ) to give 3-iodo-1-methylquinolin-4(1H)-one. (94% yield)

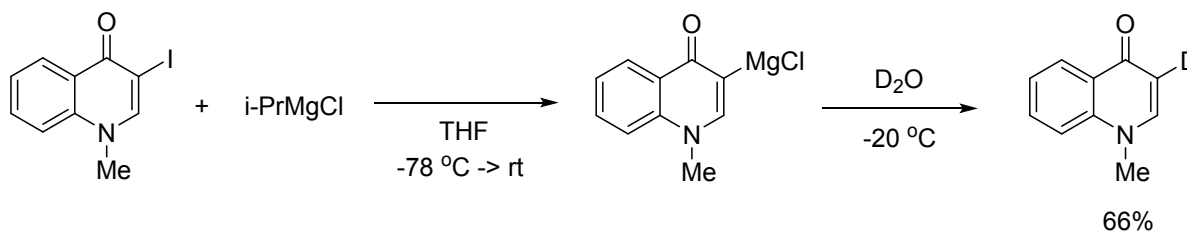

To an over-dried round bottom flask were added 3-iodo-1-methylquinolin-4(1H)-one (1 mmol, 1.0 equiv), THF (10 mL) under  $\text{N}_2$ . The solution was cooled to  $-78\text{ }^\circ\text{C}$  and  $i\text{-PrMgCl}$  (0.5 mL, 2 M in THF) was added slowly. After stirring for 1 h, the reaction mixture was allowed to warm to room temperature and re-cool to  $-20\text{ }^\circ\text{C}$ .  $\text{D}_2\text{O}$  (0.6 mL) was added slowly and the mixture was diluted with ethyl acetate, washed with water, dried over  $\text{Na}_2\text{SO}_4$ , filtered and concentrated. The product was purified with silica gel chromatography ( $\text{CH}_2\text{Cl}_2 / \text{MeOH} = 15 : 1$ ) to give 1-methylquinolin-4(1H)-one-3-d as a colorless solid. (66% yield).  $^1\text{H}$  NMR (400 MHz,  $\text{CDCl}_3$ )  $\delta$  8.56 – 8.34 (m, 1H), 7.69 (ddd,  $J = 8.7, 7.1, 1.7$  Hz, 1H), 7.51 (s, 1H), 7.46 – 7.34 (m, 2H), 3.80 (s, 3H).

[Ref] *Org. Lett.* **2012**, 14, 1176.

## 1.2 General Procedure for the Kinetic isotope experiments:

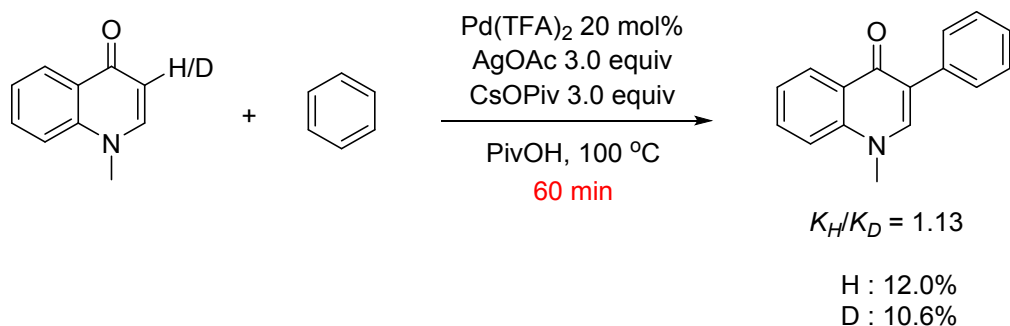

To two capped sealed tubes, were added  $\text{Pd(TFA)}_2$  (20 mol%), AgOAc (3.0 equiv), CsOPiv (3.0 equiv). In one tube, 1-methylquinolin-4(1H)-one (0.1 mmol), Benzene (0.5 mL) and Pivalic acid (0.5 mL) were added subsequently. In the other tube, 1-methylquinolin-4(1H)-one-3-d (0.1 mmol), Benzene (0.5 mL) and Pivalic acid (0.5 mL) were added. The reactions were stirred at 100 °C for 60 min. The reaction mixture was cooled to room temperature, and then diluted with  $\text{CH}_2\text{Cl}_2$  and  $\text{NaHCO}_3$ . After stirring for 10 min, the mixture was washed sequentially with aqueous  $\text{NaHCO}_3$  and  $\text{NH}_4\text{Cl}$ . The combined organic layers were dried over  $\text{MgSO}_4$ . The filtrate was concentrated in vacuo and the yield was analyzed by  $^1\text{H}$  NMR.

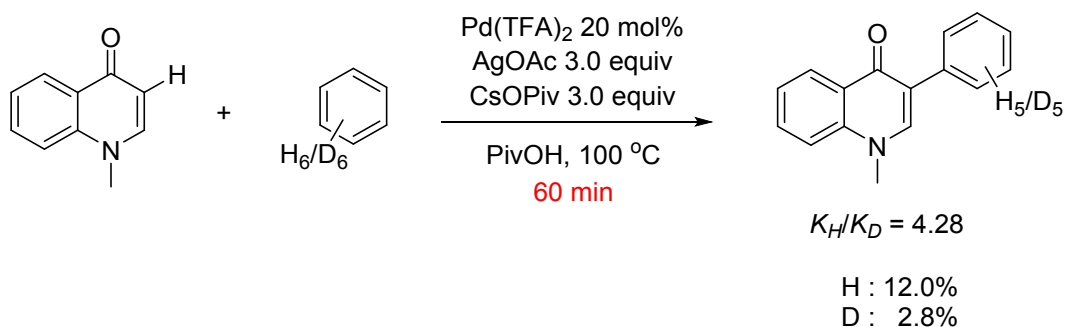

To two capped sealed tubes, were added 1-methylquinolin-4(1H)-one (0.1 mmol),  $\text{Pd(TFA)}_2$  (20 mol%), AgOAc (3.0 equiv), CsOPiv (3.0 equiv). In one tube, Benzene (0.5 mL) and Pivalic acid (0.5 mL) were added subsequently. In the other tube, Benzene- $d_6$  (0.5 mL) and Pivalic acid (0.5 mL) were added. The reactions were stirred at 100 °C for 60 min. The reaction mixture was cooled to room temperature, and then diluted with  $\text{CH}_2\text{Cl}_2$  and  $\text{NaHCO}_3$ . After stirring for 10 min, the mixture was washed sequentially with aqueous  $\text{NaHCO}_3$  and  $\text{NH}_4\text{Cl}$ . The combined organic layers were dried over  $\text{MgSO}_4$ . The filtrate was concentrated in vacuo and the yield was analyzed by  $^1\text{H}$  NMR.

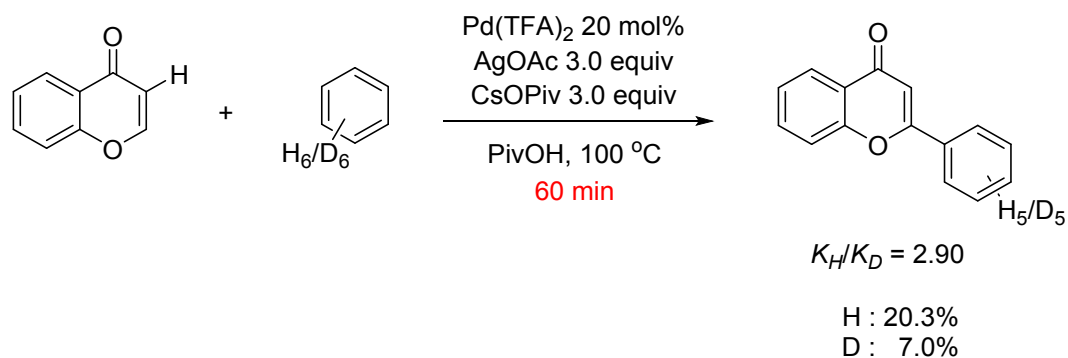

To two capped sealed tubes, were added chromone (0.1 mmol),  $\text{Pd(TFA)}_2$  (20 mol%),  $\text{AgOAc}$  (3.0 equiv),  $\text{CsOPiv}$  (3.0 equiv). In one tube, Benzene (0.5 mL) and Pivalic acid (0.5 mL) were added subsequently. In the other tube, Benzene-*d*6 (0.5 mL) and Pivalic acid (0.5 mL) were added. The reactions were stirred at 100 °C for 60 min. The reaction mixture was cooled to room temperature, and then diluted with  $\text{CH}_2\text{Cl}_2$  and  $\text{NaHCO}_3$ . After stirring for 10 min, the mixture was washed sequentially with aqueous  $\text{NaHCO}_3$  and  $\text{NH}_4\text{Cl}$ . The combined organic layers were dried over  $\text{MgSO}_4$ . The filtrate was concentrated in vacuo and the yield was analyzed by  $^1\text{H}$  NMR.

### 1.3 General Procedure for the H/D Exchange Experiments:

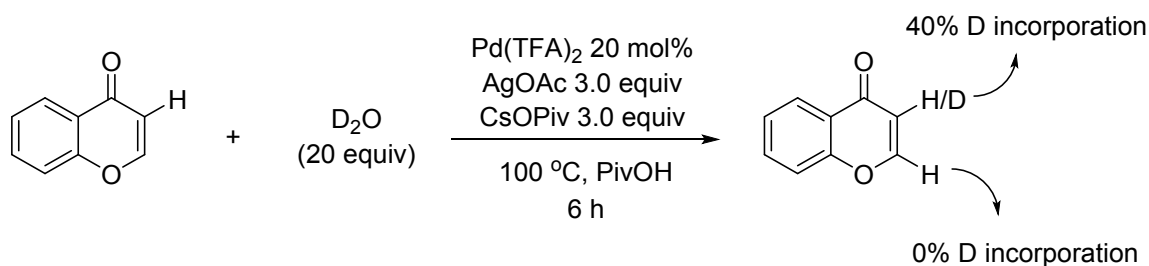

Chromone (0.1 mmol),  $\text{Pd(TFA)}_2$  (20 mol%),  $\text{AgOAc}$  (3.0 equiv),  $\text{CsOPiv}$  (3.0 equiv) and  $\text{D}_2\text{O}$  (20 equiv) were combined in PivOH (1.0 mL). The reactions were stirred at 100 °C for 6 h. The reaction mixture was diluted with  $\text{CH}_2\text{Cl}_2$  and the excess  $\text{NaHCO}_3$  was added to neutralize PivOH. After stirring the mixture for 10 min, the residue was washed with sequentially aqueous  $\text{NaHCO}_3$  and  $\text{NH}_4\text{Cl}$ . The organic layer was dried over  $\text{MgSO}_4$ . The residue was concentrated, and evaporated to dryness under high vacuum. The extent of H/D exchange was determined by integration of  $^1\text{H}$ -NMR.

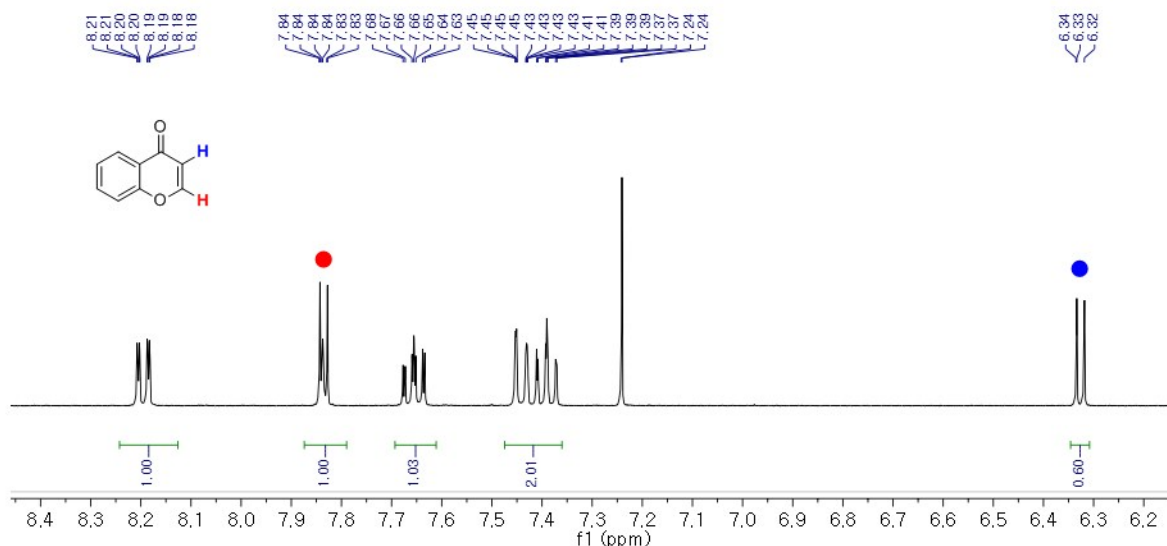

## 2. DFT CALCULATIONS

### 2.1 Stationary points:

All stationary points were fully optimized at the wb97XD/6-31G(d) level of theory, with the LANL2DZ basis set for Pd, using *Gaussian 09* with default convergence criteria for the optimizations and grid spacing for numerical integrations. Minima and transition structures were verified by the presence of zero and a single imaginary frequency, respectively, following calculation of harmonic vibrations. The effects of solvation due to toluene were described through incorporation of a conductor-like polarizable continuum model (CPCM) on single point energies. Single point energies were evaluated using a larger 6-311+G(d,p) basis set including the LANL2TZ ECP for Pd. The B3LYP functional with a D3-dispersion correction with zero-damping at short range was used to corroborate these results. Free energies were computed employing a standard state in solution of 1 mol/l in the Sackur-Tetrode expression. The experimental use of benzene in 40-fold excess causes a corresponding increase in its chemical potential by  $RT\ln(40)$  relative to the aforementioned standard state, which was applied to our computed free energy profile. Entropic contributions of low frequency mode vibrations (below  $100\text{ cm}^{-1}$ ) were treated according to a quasi-rigid-rotor harmonic oscillator (RRHO) approximation to avoid suprisingly large values, switching from the harmonic approximation using a Head-Gordon damping function as previously described by Grimme. Translational entropies were corrected for the inadequacy of the ideal gas approximation in solution by using the number density according to the effective free space of the solvent (rather than the total volume, since the solute and solvent molecules are not free to move), as proposed by Shakhnovich. This was computed for acetic acid as solvent, to model pivalic acid, using a molarity for AcOH of 17.4 mol/l and a solvent volume (computed with B3LYP/6-31G\*) of  $86.1\text{ \AA}^3$  per molecule.

### 2.2 Computational details

Quantum chemical calculations have provided important insights into the mechanisms of Pd(II)-catalyzed C-H activation of arenes,<sup>1</sup> however, the mechanism of direct cross-coupling reactions between two arenes has received relatively little computational attention.<sup>2</sup> All calculations were performed with *Gaussian 09* revision D.01.<sup>3</sup> Stationary points were located

with the range-separated, density independent atom-pairwise London dispersion-corrected wb97XD density functional of Chai and Head-Gordon,<sup>4</sup> using the 6-31G(d) basis set along with a LANL2DZ effective core potential (ECP) and associated valence basis set for Pd.<sup>5</sup> Tests of Pd–ligand bond dissociation energies against correlated *ab initio* results show the wb97XD functional to give lowest errors (<1 kcal/mol) compared with a variety of other hybrid and non-hybrid functionals employing the generalized gradient approximation (GGA),<sup>6</sup> and this method has been employed in previous studies of oxidative C-H functionalization.<sup>7</sup> Single point energies were further evaluated using a larger 6-311+G(d,p) basis set including the LANL2TZ ECP for Pd,<sup>8</sup> taking into account effects due to solvation (acetic acid) with an implicit conductor-like polarizable continuum model.<sup>9</sup> The B3LYP functional<sup>10</sup> with a D3-dispersion correction<sup>11</sup> with zero-damping at short range<sup>12</sup> was also used to corroborate these results as described in the Supporting Information (SI). Stationary points were fully optimized, and minima and transition structures (TSs) were characterized by the presence of zero or a single vibrational imaginary frequency, respectively. Free energies are quoted in kcal/mol, and were computed employing a standard state in solution of 1 mol/l in the Sackur-Tetrode expression for translational entropies. The experimental use of benzene in 40-fold excess causes a corresponding increase in its chemical potential by  $RT\ln(40)$  relative to the aforementioned standard state, which was applied to our computed free energy profile. Entropic contributions of low frequency mode vibrations (below 100 cm<sup>-1</sup>) were treated according to a quasi-rigid-rotor harmonic oscillator (RRHO) approximation to avoid spuriously large values as previously described by Grimme to improve estimates of supramolecular thermochemistry.<sup>13</sup> Translational entropies were corrected for the inadequacy of the ideal gas approximation in solution by using the number density according to the effective free space of the solvent (rather than the total volume, since the solute and solvent molecules are not free to move), as proposed by Shakhnovich.<sup>14</sup> This was computed for acetic acid as solvent, to model pivalic acid, using a molarity for AcOH of 17.4 mol/l and a solvent volume (computed with B3LYP/6-31G\*) of 86.1 Å<sup>3</sup> per molecule. All molecular graphics were produced with *Pymol*.<sup>15</sup>

### 2.2.1 Generation of grid based Potential Energy Surface (PES) of C-H arylation selectivity

Potential energy surfaces of palladium catalyzed selective C-H arylation were probed through the frozen method of energy calculations with the version of Gaussian 09 code. These quantum chemical calculations were carried out based on density functional calculations using the PBE1PBE/LanL2DZ level with geometric optimization. LanL2DZ basis was used for facilitating to describe palladium electronic structures.<sup>16</sup> In detail, the energy functions were obtained to vary two geometric parameters and distances between 1.35 and 3.55 Å by the step of 0.1 Å, respectively. The scanning grid based points were generated through 386 transition chemical structures (Figure S1). Two-dimensional potential energy surfaces (PES) were constructed with relaxed scans; the bond lengths and bond angles of the molecules except the each scan point of geometric parameters ( $\gamma_1$  and  $\gamma_2$ ) were allowed to relax for each sample conformation.

For obtaining an accurate description of the palladium catalyzed direct C–H arylation of chromone selectivity, characterization of the Potential Energy Surface (PES) using grid based method help us understand overall landscapes of potential energies in the vicinity of energy minima of those catalytic processes. A detailed method is described in the section of computational details (Figure S1 in the Supporting Information). Our calculation results support C2 arylation of chromone through carbopalladation (Figure 5). We can easily notice the potential energy surfaces have three different energy minima. Specifically, C2 region and C3 region have lower energies than those of C6 region. This result suggests palladium catalyzed arylation of chromone would have carbopalladation process. To further investigate the selectivity of C2

region and C3 region of potential energy surfaces, C2 region has lower energy than C3 region by -2.96 kcal/mol. However, this energy gap between C2 selectivity and C3 selectivity is not so large, it can also produce slightly C3-arylation at the temperature of 373K. Detail description of palladium catalyzed C–H arylation shows that benzene is spilt from palladium to attach perpendicularly to the chromone. It should be noted to find the distance of C2-C3 of chromone is extended 1.53 Å during arylation process, which means breaking up double bond of C2-C3 into single bond in the transition state (Figure 5). This extension of C–C bond supports a loss of aromaticity during carbopalladation process.

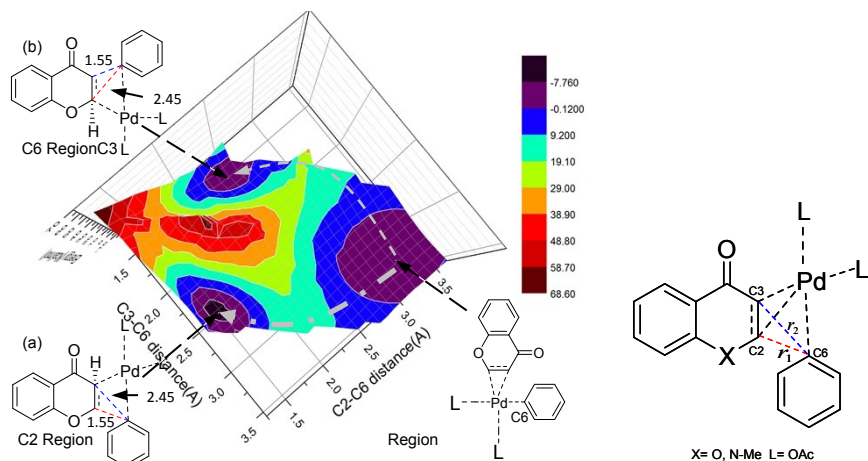

Figure S1. Potential Energy Surface of C–H Regioselectivity of Chromone through Carbopalladation; (a) Arylation of C3 Position, (b) Arylation of C2 Position. The pathway of C2 position is preferred. ( $G_{rel}$  in kcal/mol). Schematic Representation of the Palladium Catalysis Geometry. O, Oxygen; N-Me; nitrogen-methyl; L=OTFA, trifluoroacetate. Palladium catalysis geometric parameters considered here are:  $\gamma_1$ , distance between C6 and C2;  $\gamma_2$ , distance between C6 and C3.

## 2.2.2 Calculated pathway for the reaction

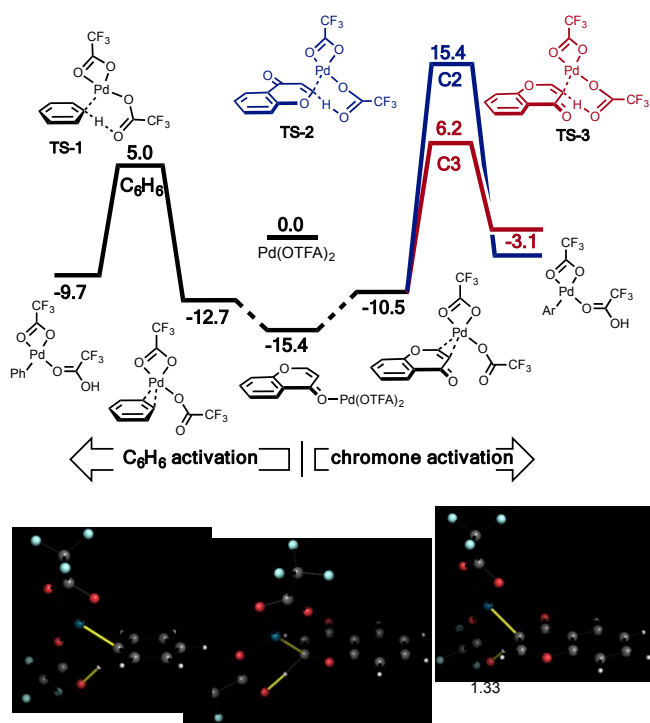

Figure S2. Palladation of benzene (40-fold excess) with Pd(OTFA)<sub>2</sub> is marginally faster than for the C3-position of chromone; the process is reversible ( $G_{rel}(373K)$  is shown in kcal/mol and has been used throughout). Structures are colored as follows: Pd(dark blue), F(light blue), O(red), C(grey), H(white).

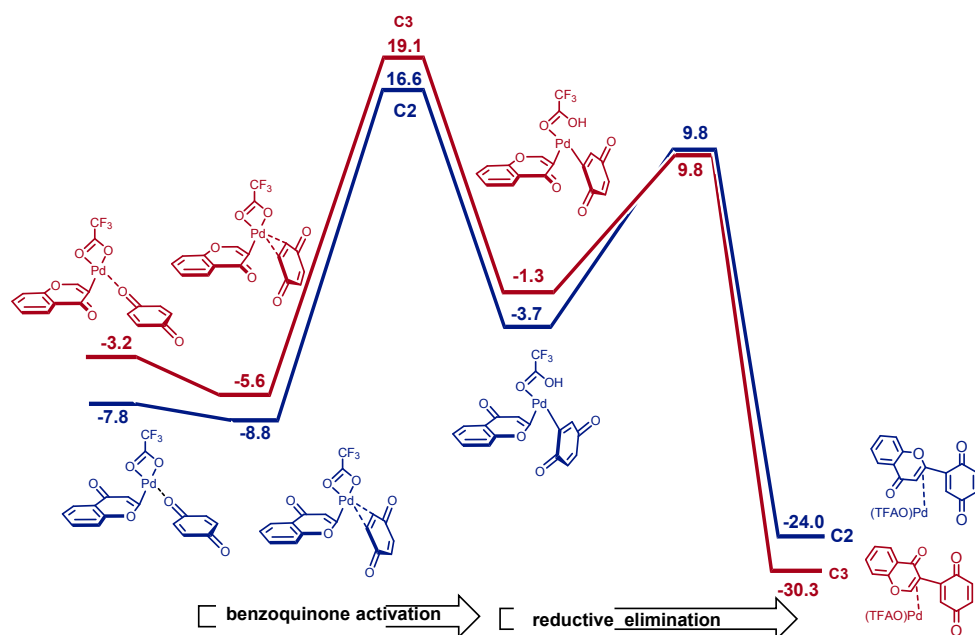

Figure S3. Energy profile of unfavorable pathway for reaction of benzoquinone



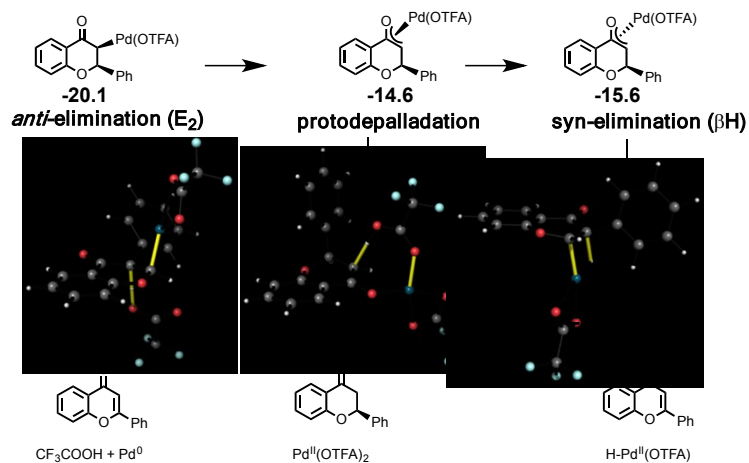

Figure S4. Possible fates for the intermediate of carbopalladation.

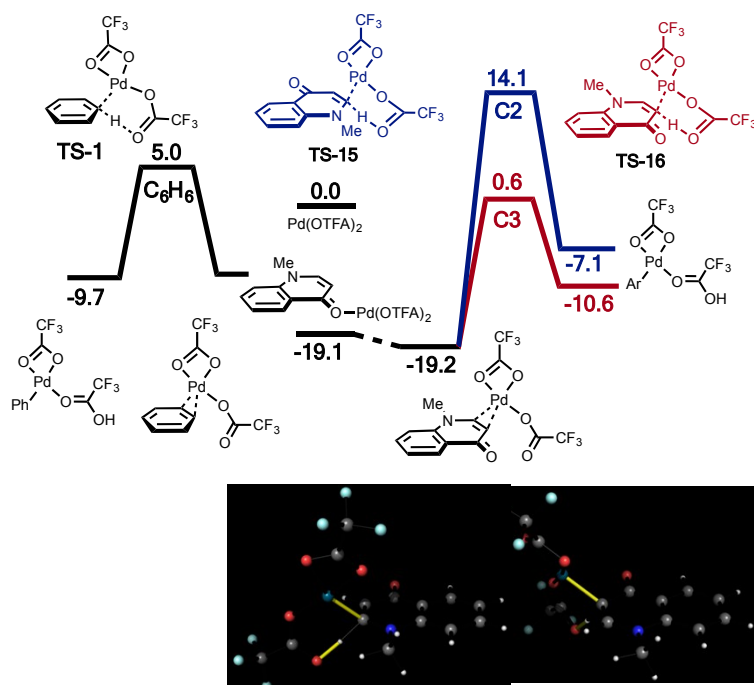

Figure S5. C-H activation of C2 and C3 Positions of enaminone; the process is reversible ( $G_{rel}$  shown in kcal/mol) and the C3 position outcompetes benzene activation.

### 2.2.3 Calculated frontier orbital and transition state structure

Table S1. Frontier orbitals of calculated substrates and electrostatic potential map (ESP)

|                                                                                     | HOMO                                                                                            | LUMO                                                                                             | ESP                                                                                   |
|-------------------------------------------------------------------------------------|-------------------------------------------------------------------------------------------------|--------------------------------------------------------------------------------------------------|---------------------------------------------------------------------------------------|
| 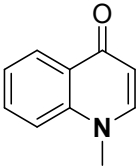   | <br>-7.95 eV   | <br>0.25 eV    |    |
|    | <br>-8.89 eV   | <br>-0.11 eV   |    |
|   | <br>-8.79 eV  | <br>-0.39 eV  |   |
|  | <br>-9.96 eV | <br>-2.02 eV |  |

Table S2. Calculated structure parameters correlated with relative energy in transition states

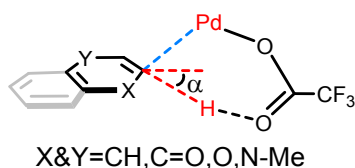

|                | Bond distance(Å) |              |       |       |                     |              |       | Angle(degree) |                  | Energy (kcal/mol) |
|----------------|------------------|--------------|-------|-------|---------------------|--------------|-------|---------------|------------------|-------------------|
|                | Pd-Ci            | Pd-H         | Ci-H  | O-H   | X-C2                | C2-C3        | C3-C4 | Pd-Ci-H       | Angle $\alpha^1$ |                   |
| <b>TS16</b>    | 2.046            | 2.399        | 1.323 | 1.294 | 1.334               | 1.393        | 1.474 | 88.1          | 53.3             | 0.6               |
| <b>TS3</b>     | 2.083            | 2.376        | 1.293 | 1.328 | 1.317               | 1.374        | 1.484 | 86.1          | 47.7             | 6.2               |
| <b>TS1</b>     | 2.081            | 2.291        | 1.317 | 1.329 | 1.412, 1.395, 1.388 |              |       | 81.4          | 47.0             | 7.7 <sup>2</sup>  |
| <b>TS15</b>    | 2.106            | 2.300        | 1.338 | 1.295 | 1.378               | 1.37         | 1.463 | 80.4          | 39.8             | 14.1              |
| <b>TS2</b>     | 2.104            | 2.274        | 1.322 | 1.318 | 1.358               | 1.359        | 1.474 | 79.4          | 37.9             | 15.4              |
| <b>TS21</b>    | 2.120            | 2.240        | 1.298 | 1.349 | 1.496               | 1.351        | 1.500 | 77.8          | 37.7             | 14.9              |
| R <sup>2</sup> | <b>0.923</b>     | <b>0.781</b> | 0.011 | 0.120 | 0.362               | <b>0.830</b> | 0.011 | <b>0.877</b>  | <b>0.992</b>     | -                 |

<sup>1</sup>. Angle  $\alpha$  is the distortion of the C-H bond out of the ring-plane (chromone, benzene, enamnone). <sup>2</sup> this energy is shown before the entropy correlation

## 2.3 Cartesian coordinates:

### Chromone stationary points:

C<sub>6</sub>H<sub>6</sub>:  
E(wB97XD/6-31G(d)&LANL2DZ) = -232.161046983  
ZPE(wB97XD/6-31G(d)&LANL2DZ) = 0.101811  
H(wB97XD/6-31G(d)&LANL2DZ) = -232.05136  
G(wB97XD/6-31G(d)&LANL2DZ) = -232.077235

C 0.109812 1.388597 -0.000258  
C 1.257757 0.599192 0.000107  
H 2.238318 1.066461 0.000271  
C -0.109919 -1.388634 -0.000084  
C -1.257660 -0.599274 -0.000044  
C -1.147784 0.789663 0.000106  
C 1.147793 -0.789531 -0.000022  
H 2.042886 -1.404995 0.000195  
H -0.195564 -2.471554 0.000069  
H -2.238336 -1.066368 0.000225  
H -2.043068 1.404805 0.000319  
H 0.195770 2.471574 0.000100

**TS1**, C6H6\_PdOTFA2\_CMD\_opt:  
E(wB97XD/6-31G(d)&LANL2DZ) = -1410.96565115  
ZPE(wB97XD/6-31G(d)&LANL2DZ) = 0.156726  
H(wB97XD/6-31G(d)&LANL2DZ) = -1410.77885  
G(wB97XD/6-31G(d)&LANL2DZ) = -1410.870204

Pd -0.219083 -0.169286 -0.127763  
O 1.591227 -1.056006 -0.476830  
C 2.598016 -0.663555 0.162206  
O 2.687918 0.357255 0.881116  
C 3.864780 -1.540359 0.067866  
H 1.569766 1.035562 0.644306  
C 0.565071 1.736455 0.160707  
C -0.071334 2.510730 1.155281  
H -0.413819 2.031060 2.067244  
C 0.171274 4.480150 -0.204119  
C 0.795510 3.737703 -1.206143  
C 0.991013 2.375771 -1.024104  
F 4.072223 -2.130208 1.248022  
F 4.921301 -0.779632 -0.222082  
F 3.745269 -2.477838 -0.864515  
C -2.572271 -0.848655 -0.052370

O -2.197334 0.340129 0.196203  
O -1.755202 -1.745044 -0.350626  
C -4.076392 -1.146788 0.034600  
F -4.332790 -2.412018 -0.276850  
F -4.509911 -0.912166 1.277626  
F -4.747165 -0.351009 -0.803039  
C -0.255398 3.873236 0.978650  
H -0.735967 4.464748 1.751259  
H 0.017739 5.546224 -0.344360  
H 1.127461 4.222698 -2.118451  
H 1.497800 1.793885 -1.789719

**3, C6H6\_PdOTFA2\_CMD\_prod:**

E(wB97XD/6-31G(d)&LANL2DZ) = -1410.99073596  
ZPE(wB97XD/6-31G(d)&LANL2DZ) = 0.162342  
H(wB97XD/6-31G(d)&LANL2DZ) = -1410.797522  
G(wB97XD/6-31G(d)&LANL2DZ) = -1410.890577

Pd -0.372696 -0.112385 -0.298050  
O 1.531349 -1.055207 -0.504076  
C 2.498421 -0.877831 0.220919  
O 2.667215 0.064620 1.101477  
C 3.709155 -1.829610 0.154205  
H 1.928729 0.716602 1.038141  
C 0.447908 1.662335 -0.164176  
C 0.044989 2.518540 0.863935  
H -0.727785 2.209133 1.561145  
C 1.582899 4.200070 0.055423  
C 1.972092 3.350204 -0.977352  
C 1.410091 2.079279 -1.090116  
F 3.914442 -2.370011 1.353977  
F 4.791890 -1.138348 -0.202337  
F 3.492047 -2.789129 -0.729706  
C -2.812245 -0.637525 -0.067433  
O -2.307441 0.530836 0.018622  
O -2.140435 -1.657054 -0.285160  
C -4.333843 -0.724920 0.139874  
F -4.782504 -1.956668 -0.081805  
F -4.636798 -0.382664 1.399574  
F -4.966808 0.114687 -0.685183  
C 0.622754 3.784187 0.973650  
H 0.310516 4.448011 1.774356  
H 2.027463 5.186603 0.142961  
H 2.714754 3.673896 -1.700585  
H 1.721079 1.420749 -1.896862

**2, C6H6\_PdOTFA2\_pi:**

E(wB97XD/6-31G(d)&LANL2DZ) = -1410.99790892  
ZPE(wB97XD/6-31G(d)&LANL2DZ) = 0.162333  
H(wB97XD/6-31G(d)&LANL2DZ) = -1410.804878  
G(wB97XD/6-31G(d)&LANL2DZ) = -1410.896645

Pd -0.051925 0.159249 -0.223520  
O 1.833887 -0.304682 -0.625335  
C 2.567047 -0.574205 0.409818  
O 2.265627 -0.486556 1.582501  
C 3.990904 -0.999747 -0.019788  
H 1.542642 1.858813 1.148771  
C 0.627219 2.197385 0.674708  
C -0.442126 2.658501 1.475465  
H -0.374501 2.562931 2.553491  
C -1.626420 3.354043 -0.520017  
C -0.592194 2.920514 -1.321498  
C 0.550617 2.325070 -0.735549  
F 3.952845 -1.991100 -0.914584  
F 4.705374 -1.401240 1.026409  
F 4.618940 0.046496 -0.582170  
C -2.184354 -1.025963 -0.070532  
O -2.106860 0.236180 0.043574  
O -1.159854 -1.712892 -0.286055  
C -3.564039 -1.682149 0.073550  
F -3.490621 -2.993639 -0.112161  
F -4.047682 -1.441648 1.295238  
F -4.405015 -1.161782 -0.824811  
C -1.550805 3.222689 0.881470  
H -2.375814 3.570065 1.494729  
H -2.507701 3.801636 -0.967547  
H -0.639939 3.034579 -2.399111  
H 1.421791 2.099516 -1.342931

**1, PdOTFA2:**

E(wB97XD/6-31G(d)&LANL2DZ) = -1178.81149962  
ZPE(wB97XD/6-31G(d)&LANL2DZ) = 0.058804  
H(wB97XD/6-31G(d)&LANL2DZ) = -1178.733331  
G(wB97XD/6-31G(d)&LANL2DZ) = -1178.795663

Pd 0.000003 0.000000 -0.000016  
O 1.759972 1.088673 0.038033  
C 2.400226 -0.000002 0.041532  
O 1.759980 -1.088684 0.038025  
C 3.933591 0.000003 0.001876  
F 4.409340 1.084385 0.603670  
F 4.332278 0.000033 -1.272651  
F 4.409344 -1.084406 0.603614  
C -2.400223 -0.000020 -0.041544  
O -1.759995 1.088669 -0.038056  
O -1.759958 -1.088691 -0.038051  
C -3.933587 -0.000011 -0.001851  
F -4.409385 -1.084607 -0.603201  
F -4.332249 0.000469 1.272687  
F -4.409344 1.084176 -0.604001

**Chromone:**

E(wB97XD/6-31G(d)&LANL2DZ) = -496.834375623

ZPE(wB97XD/6-31G(d)&LANL2DZ) = 0.129783  
H(wB97XD/6-31G(d)&LANL2DZ) = -496.691712  
G(wB97XD/6-31G(d)&LANL2DZ) = -496.734359

C -2.342894 -0.151041 -0.000349  
C -1.925360 -1.427543 -0.000183  
H -2.587759 -2.285252 -0.000793  
C 0.335963 -0.858676 0.000213  
C 0.028465 0.503644 0.000364  
C 1.080413 1.428614 0.000189  
H 0.823327 2.483013 0.000328  
C 1.657067 -1.308515 -0.000136  
H 1.853939 -2.375083 -0.000272  
C 2.678728 -0.374186 -0.000321  
H 3.710089 -0.713631 -0.000708  
C 2.394507 0.998351 -0.000100  
H 3.205142 1.719704 -0.000266  
C -1.384180 0.953472 -0.000103  
O -1.704557 2.132490 0.000086  
H -3.402716 0.072651 -0.001253  
O -0.637728 -1.818255 0.000605

**TS3**, Chromone\_PdOTFA2\_CMD\_C3\_TS:

E(wB97XD/6-31G(d)&LANL2DZ) = -1675.64541044  
ZPE(wB97XD/6-31G(d)&LANL2DZ) = 0.185075  
H(wB97XD/6-31G(d)&LANL2DZ) = -1675.425218  
G(wB97XD/6-31G(d)&LANL2DZ) = -1675.52842

Pd -0.532478 0.810867 0.051777  
O -2.425607 0.136118 -0.246114  
C -2.834211 -0.964846 0.195637  
O -2.186265 -1.821797 0.835850  
C -4.332263 -1.257799 -0.037862  
H -0.924823 -1.408884 0.804347  
C 0.284298 -1.045544 0.525023  
C 1.061664 -1.035954 1.657971  
H 0.783827 -0.505366 2.563397  
C 2.739154 -2.381884 0.758604  
C 2.070006 -2.483559 -0.459698  
C 2.666142 -3.226054 -1.484376  
H 2.139905 -3.297495 -2.430510  
C 3.967561 -2.990936 0.984672  
H 4.451632 -2.880965 1.948568  
C 4.538021 -3.722819 -0.046440  
H 5.497786 -4.204467 0.110329  
C 3.889508 -3.842915 -1.280698  
H 4.347199 -4.418701 -2.078202  
C 0.769818 -1.798276 -0.657846  
O 0.154131 -1.852640 -1.707453  
O 2.209151 -1.663740 1.815231  
F -5.021147 -0.825251 1.025785

F -4.540338 -2.564424 -0.175546  
F -4.783944 -0.634183 -1.120091  
C 0.648222 2.949802 -0.100771  
O 1.221948 1.869858 0.255163  
O -0.564905 2.981386 -0.390395  
C 1.513512 4.217358 -0.160227  
F 0.780020 5.283967 -0.453663  
F 2.109551 4.413473 1.020078  
F 2.460549 4.073427 -1.092326

**15**, Chromone\_PdOTFA2\_CMD\_C3\_prod:

E(wB97XD/6-31G(d)&LANL2DZ) = -1675.6682454  
ZPE(wB97XD/6-31G(d)&LANL2DZ) = 0.190584  
H(wB97XD/6-31G(d)&LANL2DZ) = -1675.441906  
G(wB97XD/6-31G(d)&LANL2DZ) = -1675.543429

Pd -1.031638 0.339397 0.246148  
O 0.237850 1.938221 0.686547  
C 0.877573 2.493149 -0.201285  
O 0.536749 2.606810 -1.457073  
C 2.082149 3.373534 0.172721  
H -0.234674 2.036062 -1.635576  
C 0.514480 -0.881112 0.126743  
C 0.237047 -2.176629 0.397612  
H -0.759427 -2.543372 0.613998  
C 2.431362 -2.906441 0.150741  
C 2.846797 -1.614490 -0.172785  
C 4.206440 -1.395398 -0.447231  
H 4.515089 -0.386113 -0.697228  
C 3.331050 -3.973189 0.206819  
H 2.964725 -4.961813 0.460471  
C 4.664705 -3.730937 -0.065371  
H 5.375066 -4.550752 -0.024404  
C 5.107517 -2.439831 -0.393033  
H 6.157731 -2.265374 -0.602167  
C 1.881590 -0.498708 -0.224463  
O 2.262268 0.626195 -0.559109  
O 1.128730 -3.183202 0.421240  
F 1.620625 4.606256 0.426189  
F 2.959440 3.443698 -0.817534  
F 2.670931 2.905304 1.261322  
C -3.443039 -0.246869 -0.024339  
O -2.480107 -1.080608 -0.110998  
O -3.268195 0.963707 0.184755  
C -4.854809 -0.831715 -0.192598  
F -5.782280 0.115874 -0.111139  
F -4.960629 -1.433928 -1.382110  
F -5.085723 -1.741434 0.760830

**TS2**, Chromone\_PdOTFA2\_CMD\_C2\_TS:

E(wB97XD/6-31G(d)&LANL2DZ) = -1675.62971657  
ZPE(wB97XD/6-31G(d)&LANL2DZ) = 0.184516

H(wB97XD/6-31G(d)&LANL2DZ) = -1675.410013  
G(wB97XD/6-31G(d)&LANL2DZ) = -1675.512476

Pd -0.612447 0.682586 0.078750  
O -2.569298 0.168494 0.272885  
C -2.990664 -0.874348 -0.291395  
O -2.306508 -1.753490 -0.858660  
C -4.521730 -1.065982 -0.230531  
H -1.056022 -1.450675 -0.573070  
C 0.157023 -1.269462 -0.078643  
C 0.322308 -1.876794 1.126135  
H -0.482690 -1.856102 1.853478  
C 2.591456 -2.515199 0.427564  
C 2.317750 -1.868677 -0.782641  
C 3.274936 -1.793540 -1.796347  
H 3.027553 -1.281365 -2.719442  
C 3.855715 -3.094159 0.613920  
H 4.048306 -3.591393 1.558963  
C 4.810631 -3.023669 -0.380813  
H 5.787642 -3.471601 -0.233416  
C 4.514797 -2.369485 -1.586726  
H 5.267095 -2.311240 -2.367039  
O 1.111329 -1.290398 -1.044415  
C 1.566105 -2.582723 1.482334  
O 1.718979 -3.139565 2.556864  
F -4.886559 -1.237181 1.041782  
F -5.130235 0.016051 -0.712451  
F -4.902171 -2.124716 -0.933301  
C 0.659437 2.755440 0.068549  
O 1.211776 1.621542 -0.081206  
O -0.582162 2.847755 0.213607  
C 1.539489 4.012712 0.112362  
F 0.906627 5.040218 -0.446531  
F 1.805796 4.313216 1.387354  
F 2.687016 3.806195 -0.527650

**14, Chromone\_PdOTFA2\_CMD\_C2\_prod:**  
E(wB97XD/6-31G(d)&LANL2DZ) = -1675.66442521  
ZPE(wB97XD/6-31G(d)&LANL2DZ) = 0.189747  
H(wB97XD/6-31G(d)&LANL2DZ) = -1675.438727  
G(wB97XD/6-31G(d)&LANL2DZ) = -1675.543316

Pd 0.920237 0.370983 0.153415  
O 0.027101 2.286638 -0.054937  
C -1.089128 2.776649 -0.135575  
O -2.233758 2.192034 0.036059  
C -1.241232 4.281058 -0.444774  
H -2.109861 1.247511 0.322178  
C -0.749625 -0.595252 0.344864  
C -1.635661 -0.412866 1.361020  
H -1.402237 0.268626 2.173737  
C -2.993008 -2.227157 0.387778

C -2.028671 -2.313961 -0.615128  
C -2.126184 -3.238291 -1.652173  
H -1.350650 -3.273916 -2.409133  
C -4.086841 -3.099914 0.342593  
H -4.828139 -3.022837 1.131323  
C -4.201197 -4.024962 -0.679458  
H -5.048709 -4.701727 -0.710832  
C -3.217652 -4.091800 -1.675087  
H -3.305347 -4.821215 -2.474170  
O -0.930108 -1.483238 -0.634426  
C -2.844950 -1.239074 1.480060  
O -3.651235 -1.119233 2.387415  
F -0.093357 4.780112 -0.873364  
F -2.176941 4.462823 -1.372683  
F -1.607454 4.910811 0.672387  
C 3.202571 -0.598673 0.121123  
O 2.136722 -1.290047 0.232717  
O 3.190355 0.641884 0.037140  
C 4.531951 -1.365901 0.034815  
F 4.458611 -2.534460 0.669680  
F 4.816872 -1.600034 -1.253161  
F 5.522177 -0.650930 0.563551

**12, Chromone\_PdOTFA2\_COlp:**  
E(wB97XD/6-31G(d)&LANL2DZ) = -1675.68443619  
ZPE(wB97XD/6-31G(d)&LANL2DZ) = 0.190815  
H(wB97XD/6-31G(d)&LANL2DZ) = -1675.458041  
G(wB97XD/6-31G(d)&LANL2DZ) = -1675.561218

Pd 1.101557 0.177869 -0.427139  
C 3.328212 -0.737527 -0.170125  
O 2.350496 -1.518684 -0.338534  
O 3.155030 0.510086 -0.134619  
C 4.731908 -1.320424 0.040223  
C -2.044878 -1.983720 2.206086  
C -1.149779 -1.393488 1.387099  
H -1.842407 -2.240583 3.238182  
H -0.168776 -1.128930 1.759516  
C -3.717249 -2.042928 0.593916  
C -2.878135 -1.435869 -0.346447  
C -1.520312 -1.080785 0.038082  
O -0.768093 -0.544172 -0.811738  
C -3.383339 -1.170874 -1.632098  
C -5.032786 -2.391031 0.283865  
C -5.504753 -2.120578 -0.986457  
H -6.527462 -2.380840 -1.239843  
C -4.682026 -1.509792 -1.947857  
H -5.073067 -1.303064 -2.938146  
H -2.728762 -0.693198 -2.352566  
H -5.651489 -2.857720 1.041940  
F 4.863054 -2.471175 -0.615407  
F 4.917166 -1.550052 1.345970

F 5.664001 -0.470812 -0.379825  
O -3.289232 -2.317074 1.856434  
C -0.510687 2.292958 0.438155  
O 0.335547 2.007257 -0.493124  
O -0.877376 1.604515 1.372194  
C -1.088734 3.714223 0.237143  
F -1.941817 4.027406 1.211108  
F -0.113853 4.630258 0.222309  
F -1.745806 3.786148 -0.930278

**13, Chromone\_PdOTFA2\_pi:**

E(wB97XD/6-31G(d)&LANL2DZ) = -1675.6750434  
ZPE(wB97XD/6-31G(d)&LANL2DZ) = 0.190086  
H(wB97XD/6-31G(d)&LANL2DZ) = -1675.449347  
G(wB97XD/6-31G(d)&LANL2DZ) = -1675.551881

Pd 0.969638 -0.205338 -0.293198  
C 3.376369 0.174581 -0.009243  
O 2.836214 -0.975547 0.110533  
O 2.696618 1.181781 -0.289008  
C 4.892513 0.271229 0.215415  
C -0.082969 -1.948451 0.972221  
C -0.085977 -2.087915 -0.416470  
H 0.769108 -2.209973 1.592263  
H 0.709152 -2.664674 -0.883336  
C -2.336717 -1.342889 1.061186  
C -2.507479 -1.534120 -0.310638  
C -1.380235 -1.991745 -1.149965  
O -1.480045 -2.282152 -2.323701  
O -1.131501 -1.609794 1.689632  
C -3.757302 -1.256356 -0.871327  
C -3.357119 -0.871823 1.874910  
C -4.585636 -0.593613 1.293410  
H -5.389837 -0.208970 1.911778  
C -4.789960 -0.788663 -0.076196  
H -5.752820 -0.557258 -0.518416  
H -3.878460 -1.398383 -1.939670  
H -3.168224 -0.709157 2.929338  
F 5.524400 -0.583134 -0.592401  
F 5.174282 -0.053224 1.481045  
F 5.331302 1.499524 -0.023829  
C -1.202116 1.439277 0.189402  
O -0.643934 0.829568 -0.808145  
O -0.886482 1.380762 1.361203  
C -2.386881 2.327719 -0.255787  
F -3.013521 1.833971 -1.327618  
F -3.277373 2.441470 0.731372  
F -1.938887 3.551795 -0.560843

**10-2, Chromone\_PdPhOAc\_13\_C3\_flip:**

E(wB97XD/6-31G(d)&LANL2DZ) = -1381.20333738

ZPE(wB97XD/6-31G(d)&LANL2DZ) = 0.253509  
H(wB97XD/6-31G(d)&LANL2DZ) = -1380.916886  
G(wB97XD/6-31G(d)&LANL2DZ) = -1381.012197

Pd -1.218479 0.422510 -0.823820  
C -3.453989 -0.196983 0.058862  
O -3.459622 0.791242 -0.697657  
O -2.389757 -0.824913 0.359580  
C -4.765428 -0.736993 0.650848  
C 2.568042 -1.737685 0.106485  
C 3.539635 -1.234389 -0.763107  
C 2.777654 -2.974704 0.716392  
C 4.701714 -1.956371 -1.013380  
H 3.395627 -0.273708 -1.249594  
C 3.937886 -3.700630 0.463377  
H 2.028074 -3.370901 1.396768  
C 4.901997 -3.191837 -0.402104  
H 5.449313 -1.556297 -1.691513  
H 4.087174 -4.663849 0.941574  
H 5.807585 -3.756585 -0.601912  
C 1.309893 -0.951961 0.432123  
C 0.690239 -0.326997 -0.795633  
H 0.583926 -1.621465 0.900245  
C 2.080553 1.225323 1.099859  
C 1.760889 1.836951 -0.124885  
C 0.924459 1.077820 -1.043166  
O 0.187987 1.595311 -1.942247  
O 1.584109 0.020396 1.457875  
C 2.197135 3.137332 -0.400642  
C 2.851413 1.916852 2.033815  
C 3.292805 3.198649 1.737746  
H 3.896850 3.730665 2.466624  
C 2.973760 3.815771 0.522690  
H 3.326068 4.819461 0.311125  
H 1.916106 3.590866 -1.345844  
H 3.082529 1.437378 2.978331  
H 0.648270 -0.974016 -1.672638  
F -4.627795 -0.965443 1.959974  
F -5.082337 -1.893642 0.054015  
F -5.766002 0.119728 0.471175

**10-1, Chromone\_PdPhOAc\_13\_C2\_ii:**

E(wB97XD/6-31G(d)&LANL2DZ) = -1381.20689018  
ZPE(wB97XD/6-31G(d)&LANL2DZ) = 0.254059  
H(wB97XD/6-31G(d)&LANL2DZ) = -1380.920206  
G(wB97XD/6-31G(d)&LANL2DZ) = -1381.013000

Pd -0.732544 -1.168631 0.082203  
C -3.165550 -0.606021 0.076102  
O -2.827176 -1.307961 1.042970  
O -2.363795 -0.270526 -0.852809

C -4.591553 -0.044056 -0.034474  
 C 0.943455 1.706459 -0.554669  
 C 1.828323 2.327497 0.325705  
 C -0.396250 2.106581 -0.566163  
 C 1.371389 3.309884 1.202411  
 H 2.879757 2.062847 0.336189  
 C -0.852352 3.079224 0.315407  
 H -1.096920 1.638208 -1.250225  
 C 0.031448 3.681872 1.207688  
 H 2.071234 3.783385 1.884501  
 H -1.900894 3.360730 0.302083  
 H -0.321572 4.441159 1.898838  
 C 1.353206 0.584004 -1.495807  
 C 0.894797 -0.800864 -1.049779  
 H 0.951794 0.793167 -2.488694  
 H 0.816897 -1.521146 -1.871383  
 C 3.574343 -0.034161 -0.793616  
 C 3.096566 -0.933485 0.180494  
 C 1.718144 -1.324270 0.055996  
 O 1.067624 -2.053717 0.844422  
 O 2.783705 0.561977 -1.706696  
 C 3.969349 -1.470870 1.140979  
 C 4.936973 0.279465 -0.825524  
 C 5.784124 -0.273759 0.120545  
 H 6.839507 -0.018979 0.093667  
 C 5.309605 -1.143409 1.115060  
 H 5.992927 -1.555664 1.849234  
 H 3.566081 -2.155489 1.880623  
 H 5.297254 0.969169 -1.580651  
 F -5.399810 -0.573930 0.877961  
 F -4.557588 1.285228 0.148968  
 F -5.100157 -0.282754 -1.247015

**TS-12**, Chromone\_PdPhOAc\_C3\_bH\_TS:  
 E(wB97XD/6-31G(d)&LANL2DZ) = -1381.18735702  
 ZPE(wB97XD/6-31G(d)&LANL2DZ) = 0.248617  
 H(wB97XD/6-31G(d)&LANL2DZ) = -1380.905878  
 G(wB97XD/6-31G(d)&LANL2DZ) = -1381.001325

Pd -0.588853 -0.392867 -0.060139  
 C -3.064756 -0.518053 -0.153890  
 O -2.533613 -0.167596 0.927813  
 O -2.397917 -0.812967 -1.181027  
 C -4.597892 -0.573991 -0.259557  
 C 1.797908 -0.281486 0.045361  
 C 1.005099 0.031280 1.203030  
 H 0.970628 -0.705685 2.002127  
 C 1.996630 2.007314 -0.514949  
 C 1.248103 2.427467 0.585181  
 C 0.831303 1.447743 1.613572  
 O 0.378706 1.763963 2.696388

O 2.388648 0.701906 -0.678768  
 C 0.934838 3.784958 0.708880  
 C 2.424507 2.903899 -1.489421  
 C 2.093810 4.243927 -1.352462  
 H 2.418307 4.951482 -2.108837  
 C 1.349166 4.688898 -0.254231  
 H 1.098084 5.739976 -0.159367  
 H 0.359450 4.094667 1.575193  
 H 3.003025 2.539067 -2.330936  
 C 2.560885 -1.568106 -0.033481  
 C 1.939318 -2.783783 0.258856  
 C 3.919873 -1.538794 -0.346103  
 C 2.676811 -3.960213 0.254413  
 H 0.872047 -2.810743 0.466426  
 C 4.653590 -2.721620 -0.351476  
 H 4.401956 -0.595523 -0.575655  
 C 4.036615 -3.931355 -0.050268  
 H 2.185866 -4.902294 0.475858  
 H 5.711886 -2.693220 -0.591024  
 H 4.610313 -4.852900 -0.059301  
 H 0.663766 -0.659591 -1.002038  
 F -5.030681 0.418423 -1.048491  
 F -5.175936 -0.446488 0.932247  
 F -4.985554 -1.734635 -0.797315

Chromone\_PdPhOAc\_C3\_bH\_prod:  
 E(wB97XD/6-31G(d)&LANL2DZ) = -1381.20237122  
 ZPE(wB97XD/6-31G(d)&LANL2DZ) = 0.250303  
 H(wB97XD/6-31G(d)&LANL2DZ) = -1380.918513  
 G(wB97XD/6-31G(d)&LANL2DZ) = -1381.013887

Pd -0.275163 0.784725 0.030065  
 C -2.767741 1.033563 -0.169132  
 O -2.416542 0.229589 0.716970  
 O -1.956363 1.679549 -0.898210  
 C -4.263832 1.287848 -0.424785  
 C 1.198059 -1.017042 0.342919  
 C 1.187514 -0.047268 1.359416  
 H 0.592011 -0.213910 2.252091  
 C 3.199310 -0.139993 -0.564834  
 C 3.331035 0.815870 0.441237  
 C 2.343857 0.863691 1.542219  
 O 2.466546 1.573109 2.521694  
 O 2.178775 -1.057165 -0.573125  
 C 4.416651 1.695756 0.397432  
 C 4.110774 -0.227470 -1.612536  
 C 5.175452 0.660593 -1.641780  
 H 5.893392 0.604010 -2.453770  
 C 5.332581 1.623631 -0.638192  
 H 6.168858 2.313743 -0.674583  
 H 4.505873 2.429709 1.191633  
 H 3.973479 -0.982558 -2.378639



C 0.304671 -2.193448 0.263266  
 C -0.732355 -2.374167 1.187818  
 C 0.486295 -3.135915 -0.757541  
 C -1.567706 -3.478195 1.092803  
 H -0.918568 -1.645408 1.967769  
 C -0.351958 -4.239282 -0.844834  
 H 1.281365 -3.001002 -1.480742  
 C -1.379691 -4.413705 0.079041  
 H -2.372834 -3.599843 1.809494  
 H -0.203558 -4.964019 -1.639001  
 H -2.037172 -5.274426 0.005350  
 H 0.850922 1.502216 -0.690638  
 F -4.562003 2.568703 -0.177584  
 F -5.026717 0.520869 0.352249  
 F -4.566067 1.026727 -1.701966

**TS6**, Chromone\_PdPhOAc\_CMD\_C3\_RE\_TS:  
 E(wB97XD/6-31G(d)&LANL2DZ) = -1381.167832  
 ZPE(wB97XD/6-31G(d)&LANL2DZ) = 0.251088  
 H(wB97XD/6-31G(d)&LANL2DZ) = -1380.883547  
 G(wB97XD/6-31G(d)&LANL2DZ) = -1380.978233

Pd 1.5671576 1.2108638 -0.9092792  
 C -0.0419454 2.1429868 -0.1521482  
 C -0.6169744 3.1555638 -0.9389672  
 C -1.1892944 4.2725458 -0.3414942  
 C -1.2223864 4.3895238 1.0476028  
 C -0.6718374 3.3829518 1.8350168  
 C -0.0874264 2.2640298 1.2453778  
 O 3.5639976 0.2089888 -1.0829232  
 C 3.9233066 -0.5475552 -0.1957492  
 O 3.2388896 -1.0251012 0.7960008  
 C 5.3742356 -1.0713832 -0.1726832  
 H -0.6103754 3.0762918 -2.0229862  
 H -1.6125714 5.0557968 -0.9643222  
 H -1.6790104 5.2589448 1.5108658  
 H -0.6956644 3.4653348 2.9181128  
 H 0.3230446 1.4730118 1.8646158  
 H 2.2639786 -0.7596942 0.8154008  
 C -0.2397604 0.2781478 -0.7537732  
 C -1.1255524 0.1706218 -1.7780452  
 H -1.2145774 0.8976118 -2.5752052  
 C -2.1542764 -1.7629882 -0.9876302  
 C -1.2991974 -1.7908632 0.1164148  
 C -1.4565384 -2.8169182 1.0646028  
 C -3.1549814 -2.7232512 -1.1623252  
 H -3.7963374 -2.6682332 -2.0350202  
 C -3.2955844 -3.7145902 -0.2099792  
 H -4.0710274 -4.4645662 -0.3319592  
 C -2.4469264 -3.7644472 0.9088878  
 H -2.5698604 -4.5511752 1.6459448  
 C -0.2313854 -0.7957332 0.2360978

O 0.6321576 -0.9032392 1.1248868  
 F 5.3791196 -2.3946512 -0.3594152  
 F 5.9410106 -0.8056742 1.0063148  
 F 6.0932886 -0.5018182 -1.1315152  
 O -2.0397934 -0.8067642 -1.9404832  
 H -0.7769024 -2.8345702 1.9097618

**8(C3)**, Chromone\_PdPhOAc\_CMD\_C3\_RETS\_prod:  
 E(wB97XD/6-31G(d)&LANL2DZ) = -1381.21858523  
 ZPE(wB97XD/6-31G(d)&LANL2DZ) = 0.253186  
 H(wB97XD/6-31G(d)&LANL2DZ) = -1380.931632  
 G(wB97XD/6-31G(d)&LANL2DZ) = -1381.029617

Pd -0.101705 -0.834182 0.442228  
 C -2.997571 -0.559524 -0.040751  
 C -4.010909 -0.644234 0.919586  
 C -5.070473 -1.532139 0.758180  
 C -5.140380 -2.337026 -0.374400  
 C -4.147658 -2.243081 -1.347730  
 C -3.085131 -1.363132 -1.185527  
 O 1.889310 -1.851453 0.310181  
 C 2.799567 -1.116451 -0.025473  
 O 2.711219 0.163069 -0.278746  
 C 4.236527 -1.642400 -0.195005  
 H -3.984154 0.002510 1.792509  
 H -5.847087 -1.584579 1.515426  
 H -5.967563 -3.028854 -0.502481  
 H -4.199870 -2.860432 -2.239605  
 H -2.319092 -1.284789 -1.948126  
 H 1.761619 0.431106 -0.152240  
 C -1.844015 0.366821 0.146910  
 C -1.332382 0.623417 1.432815  
 H -1.749822 0.158227 2.319815  
 C -0.180088 2.565081 0.808035  
 C -0.497889 2.360496 -0.538737  
 C 0.037330 3.234012 -1.495162  
 H -0.229671 3.066475 -2.533503  
 C 0.660284 3.607889 1.202482  
 H 0.886090 3.732437 2.256028  
 C 1.183172 4.452245 0.237315  
 H 1.841124 5.261833 0.537990  
 C 0.875038 4.267549 -1.116906  
 H 1.290325 4.935634 -1.864295  
 C -1.430745 1.279088 -0.953224  
 O -1.816006 1.171655 -2.106711  
 O -0.659469 1.759897 1.790592  
 F 5.047426 -1.009995 0.654924  
 F 4.655314 -1.414776 -1.440463  
 F 4.282597 -2.943476 0.047652

**TS5**, Chromone\_PdPhOAc\_CMD\_C3\_TS:  
 E(wB97XD/6-31G(d)&LANL2DZ) = -1381.14804281

ZPE(wB97XD/6-31G(d)&LANL2DZ) = 0.246117  
H(wB97XD/6-31G(d)&LANL2DZ) = -1380.868241  
G(wB97XD/6-31G(d)&LANL2DZ) = -1380.967384

Pd 0.746410 1.299588 0.083435  
C -1.090286 1.967769 0.044268  
C -1.542605 2.638230 -1.095503  
C -2.746393 3.341743 -1.052864  
C -3.510149 3.349947 0.111474  
C -3.073375 2.651590 1.235044  
C -1.872065 1.944656 1.201920  
O 2.866006 0.773207 0.166706  
C 3.170439 -0.416523 -0.026307  
O 2.398610 -1.379418 -0.291267  
C 4.671660 -0.779276 0.005556  
H -0.961136 2.626307 -2.014651  
H -3.090500 3.874246 -1.935121  
H -4.452133 3.889612 0.139550  
H -3.673117 2.646848 2.140963  
H -1.550177 1.376859 2.070864  
H 1.178484 -0.954561 -0.300480  
C -0.105715 -0.587067 -0.307191  
C -0.627459 -0.709956 -1.569770  
H -0.124874 -0.337205 -2.456472  
C -2.542512 -1.858404 -0.907689  
C -2.153854 -1.812768 0.429893  
C -3.001278 -2.380664 1.387592  
H -2.692167 -2.332155 2.426581  
C -3.732443 -2.454131 -1.313220  
H -3.992285 -2.466801 -2.365945  
C -4.552301 -3.015190 -0.346215  
H -5.484096 -3.484796 -0.645072  
C -4.189382 -2.980018 1.005599  
H -4.841449 -3.421989 1.751799  
C -0.890513 -1.140213 0.818156  
O -0.548405 -1.038560 1.985889  
O -1.759649 -1.314765 -1.901944  
F 5.124515 -0.876305 -1.253947  
F 4.870616 -1.949887 0.612555  
F 5.385479 0.150691 0.635885

**7, Chromone\_PdPhOAc\_CMD\_C3\_prod:**

E(wB97XD/6-31G(d)&LANL2DZ) = -1381.183928  
ZPE(wB97XD/6-31G(d)&LANL2DZ) = 0.251512  
H(wB97XD/6-31G(d)&LANL2DZ) = -1380.898645  
G(wB97XD/6-31G(d)&LANL2DZ) = -1380.999385

Pd 1.4697917 1.2182544 -0.3961705  
C 0.1369927 2.5922494 0.0307725  
C -0.0902433 3.5921884 -0.9231715  
C -0.8707083 4.7048894 -0.6076355

C -1.4451213 4.8210384 0.6547335  
C -1.2399843 3.8191344 1.6011325  
C -0.4630773 2.7048234 1.2896975  
O 3.3273977 0.0785854 -0.8429145  
C 3.9103447 -0.7481976 -0.1531175  
O 3.4296597 -1.4715946 0.7948225  
C 5.4048037 -1.0323596 -0.4071895  
H 0.3421737 3.5118034 -1.9183765  
H -1.0320593 5.4784294 -1.3537115  
H -2.0572503 5.6844224 0.8989085  
H -1.6926313 3.9013414 2.5856335  
H -0.3251163 1.9222174 2.0300935  
H 2.4018187 -1.3798356 0.8852545  
C -0.0662243 -0.0447556 -0.4806325  
C -1.1683713 0.1861834 -1.2347045  
H -1.3338933 1.0902674 -1.8056455  
C -2.2309013 -1.8125056 -0.6894305  
C -1.1715013 -2.1661436 0.1487185  
C -1.2404043 -3.3883166 0.8403275  
C -3.3447333 -2.6421876 -0.8519615  
H -4.1447033 -2.3296456 -1.5139735  
C -3.3877113 -3.8370186 -0.1599875  
H -4.2460363 -4.4912946 -0.2778525  
C -2.3347053 -4.2144806 0.6904095  
H -2.3840833 -5.1575016 1.2247905  
C -0.0085043 -1.2807296 0.2736935  
O 0.9375417 -1.6289196 1.0091245  
F 5.5415777 -2.2478476 -0.9462955  
F 6.0868497 -0.9953156 0.7386415  
F 5.9192247 -0.1352456 -1.2406695  
O -2.2195343 -0.6478946 -1.3793635  
H -0.4106783 -3.6540386 1.4860495

**TS7, Chromone\_PdPhOAc\_CMD\_C2\_RETs:**

E(wB97XD/6-31G(d)&LANL2DZ) = -1381.16077053  
ZPE(wB97XD/6-31G(d)&LANL2DZ) = 0.250258  
H(wB97XD/6-31G(d)&LANL2DZ) = -1380.876838  
G(wB97XD/6-31G(d)&LANL2DZ) = -1380.974222

Pd 0.345701 -1.574316 -0.261236  
C -1.631017 -1.885524 0.023246  
C -2.029155 -2.497456 1.219289  
C -3.199151 -3.248911 1.264431  
C -3.994253 -3.374379 0.126507  
C -3.619436 -2.742896 -1.056731  
C -2.448846 -1.990387 -1.108105  
O 2.523981 -1.119267 -0.451738  
C 3.015852 -0.106723 0.011161  
O 2.418903 0.836744 0.684675  
C 4.518676 0.190979 -0.165574  
H -1.433181 -2.375218 2.119287  
H -3.497168 -3.726514 2.193226

H -4.914223 -3.949958 0.167657  
H -4.244414 -2.827508 -1.941106  
H -2.176847 -1.471544 -2.022012  
H 1.454394 0.646544 0.806194  
C -0.799757 -0.026285 0.229696  
C -0.680774 0.548902 1.465721  
H -0.375104 -0.060306 2.309673  
C -1.587474 2.637087 0.536467  
C -1.654958 1.975329 -0.688326  
C -2.139035 2.606841 -1.833417  
H -2.174921 2.057987 -2.768300  
C -2.021630 3.965805 0.607688  
H -1.961304 4.463224 1.570319  
C -2.506082 4.607074 -0.518499  
H -2.841426 5.637460 -0.458764  
C -2.563266 3.922401 -1.739405  
H -2.944437 4.422998 -2.624224  
O -1.242975 0.677024 -0.836144  
C -1.070676 1.929286 1.731306  
O -0.979598 2.463357 2.828287  
F 5.098313 -0.772129 -0.867482  
F 4.676060 1.351437 -0.803303  
F 5.104492 0.273095 1.029842

**9(C2)**, Chromone\_PdPhOAc\_CMD\_C3\_RETS\_prod:  
E(wB97XD/6-31G(d)&LANL2DZ) = -1381.23109159  
ZPE(wB97XD/6-31G(d)&LANL2DZ) = 0.252591  
H(wB97XD/6-31G(d)&LANL2DZ) = -1380.945085  
G(wB97XD/6-31G(d)&LANL2DZ) = -1381.041142

Pd -0.185790 0.456996 -0.757302  
C 2.439865 1.651573 0.242743  
C 1.746980 2.800124 0.649818  
C 2.389886 4.029462 0.709908  
C 3.732394 4.137341 0.353651  
C 4.424367 3.003901 -0.061741  
C 3.786382 1.768903 -0.116745  
O -2.439991 0.377454 -0.882424  
C -3.213543 0.120249 0.024396  
O -2.996712 -0.452869 1.164919  
C -4.700698 0.514909 -0.111863  
H 0.692467 2.735035 0.902380  
H 1.836985 4.908144 1.027773  
H 4.233241 5.099612 0.396436  
H 5.471072 3.077889 -0.341309  
H 4.333629 0.888986 -0.433459  
H -2.068126 -0.841122 1.328967  
C 1.754512 0.333782 0.198352  
C 0.691838 -0.026911 1.066168  
H 0.328771 0.659633 1.826282  
C 1.151161 -2.391622 0.520133  
C 2.278273 -1.950034 -0.182271

C 3.158214 -2.863341 -0.768147  
H 4.019290 -2.489890 -1.311671  
C 0.911122 -3.769060 0.628091  
H 0.027210 -4.087856 1.170518  
C 1.782223 -4.678440 0.059852  
H 1.597339 -5.743606 0.150727  
C 2.907433 -4.218129 -0.639191  
H 3.592569 -4.930376 -1.088900  
O 2.566086 -0.638461 -0.351984  
C 0.247697 -1.409646 1.130165  
O -0.816626 -1.750835 1.683093  
F -4.926648 1.096391 -1.284221  
F -5.478351 -0.565903 -0.012268  
F -5.033755 1.369629 0.860866

**TS4**, Chromone\_PdPhOAc\_CMD\_C2\_TS:  
E(wB97XD/6-31G(d)&LANL2DZ) = -1381.13567001  
ZPE(wB97XD/6-31G(d)&LANL2DZ) = 0.245644  
H(wB97XD/6-31G(d)&LANL2DZ) = -1380.856183  
G(wB97XD/6-31G(d)&LANL2DZ) = -1380.954258

Pd -0.779746 1.223697 0.018353  
C 1.094641 1.753658 -0.110717  
C 1.696017 2.375415 0.982970  
C 2.945510 2.975231 0.820940  
C 3.594411 2.919926 -0.409396  
C 3.000158 2.263833 -1.485440  
C 1.753136 1.660177 -1.335853  
O -2.934238 0.817837 0.066984  
C -3.295158 -0.367141 -0.005698  
O -2.561181 -1.399992 0.004018  
C -4.803798 -0.647525 -0.176709  
H 1.210648 2.389872 1.955169  
H 3.417847 3.465382 1.667074  
H 4.573356 3.374700 -0.526159  
H 3.512018 2.208011 -2.441646  
H 1.306070 1.118426 -2.164828  
H -1.384295 -1.060653 0.078202  
C -0.028955 -0.761954 0.238691  
C 0.468845 -0.835055 1.508085  
H -0.158819 -0.536838 2.341715  
C 2.593699 -1.678019 0.607803  
C 1.991276 -1.608318 -0.651990  
C 2.690903 -1.972017 -1.805630  
H 2.192468 -1.906293 -2.766688  
C 3.922010 -2.117434 0.701525  
H 4.370000 -2.164001 1.688777  
C 4.623071 -2.476200 -0.433105  
H 5.650736 -2.816063 -0.356918  
C 4.000529 -2.401016 -1.688189  
H 4.550310 -2.682064 -2.581410  
O 0.711188 -1.182338 -0.829792

C 1.833571 -1.291277 1.808622  
O 2.289329 -1.313339 2.942198  
F -5.534641 0.378820 0.250670  
F -5.061785 -0.840394 -1.477203  
F -5.169352 -1.739712 0.493175

**6, Chromone\_PdPhOAc\_CMD\_C2\_prod:**

E(wB97XD/6-31G(d)&LANL2DZ) = -1381.16803283  
ZPE(wB97XD/6-31G(d)&LANL2DZ) = 0.251108  
H(wB97XD/6-31G(d)&LANL2DZ) = -1380.882484  
G(wB97XD/6-31G(d)&LANL2DZ) = -1380.983405

Pd -0.248740 1.565877 -0.176354

C 1.619410 2.181667 -0.011025  
C 1.989579 2.881497 1.142043  
C 3.229171 3.516397 1.207981  
C 4.114057 3.435869 0.136109  
C 3.760261 2.713528 -1.001171  
C 2.522603 2.076496 -1.072264  
O -2.429557 1.060173 -0.352350  
C -3.032467 0.057458 -0.017647  
O -2.555007 -1.009949 0.555429  
C -4.552009 -0.064959 -0.255242  
H 1.318055 2.932392 1.995242  
H 3.506712 4.063245 2.104894  
H 5.082954 3.923239 0.192601  
H 4.454701 2.636942 -1.833424  
H 2.265882 1.492354 -1.951413  
H -1.580951 -0.930629 0.728947  
C 0.539486 -0.183211 0.249334  
C 0.388791 -0.799342 1.455990  
H -0.022151 -0.245941 2.294146  
C 1.524845 -2.778506 0.533878  
C 1.618204 -2.070922 -0.663502  
C 2.216940 -2.625745 -1.793980  
H 2.268726 -2.043790 -2.707818  
C 2.053587 -4.073540 0.594116  
H 1.973741 -4.605266 1.536819  
C 2.652227 -4.638125 -0.517585  
H 3.061841 -5.641760 -0.467460  
C 2.731340 -3.909284 -1.711907  
H 3.200389 -4.351433 -2.585531  
O 1.120072 -0.799653 -0.797425  
C 0.883225 -2.153491 1.712487  
O 0.777055 -2.720618 2.789858  
F -5.015830 1.028888 -0.842687  
F -4.801820 -1.118437 -1.033542  
F -5.176113 -0.232010 0.911282

**4, Chromone\_PdPhOAc\_COlp:**

E(wB97XD/6-31G(d)&LANL2DZ) = -1381.20359756  
ZPE(wB97XD/6-31G(d)&LANL2DZ) = 0.252321

H(wB97XD/6-31G(d)&LANL2DZ) = -1380.917195  
G(wB97XD/6-31G(d)&LANL2DZ) = -1381.016834

Pd 0.830584 0.341757 0.094845  
C 2.767112 -1.301435 0.038927  
O 1.671443 -1.885715 0.130915  
O 2.900855 -0.044127 -0.023190  
C 4.067223 -2.125455 0.036449  
C 0.891106 2.291569 -0.004279  
C 2.029923 2.869246 -0.562096  
C -0.146797 3.085403 0.477731  
C 2.119577 4.258177 -0.648070  
H 2.845353 2.245616 -0.914826  
C -0.040383 4.473865 0.395613  
H -1.029153 2.632241 0.916320  
C 1.087268 5.061612 -0.170864  
H 3.005082 4.710158 -1.086284  
H -0.845336 5.096522 0.777357  
H 1.164289 6.142993 -0.236860  
C -2.443541 -2.966074 -0.241416  
C -1.549649 -1.963533 -0.117512  
H -2.169872 -4.008485 -0.348831  
H -0.486870 -2.184871 -0.115705  
C -4.290897 -1.558526 -0.123636  
C -3.467995 -0.436088 0.012433  
C -2.017144 -0.608256 0.026759  
O -1.278605 0.390759 0.159154  
C -4.067126 0.829929 0.126369  
C -5.681990 -1.447521 -0.141866  
C -6.246777 -0.191250 -0.023832  
H -7.327329 -0.089882 -0.037291  
C -5.441385 0.951795 0.108589  
H -5.902759 1.929490 0.196488  
H -3.419984 1.695288 0.220147  
H -6.283994 -2.342972 -0.248110  
F 3.825923 -3.412085 -0.217601  
F 4.658231 -2.039106 1.236453  
F 4.922409 -1.668655 -0.883190  
O -3.772008 -2.812049 -0.247136

**11, Chromone\_PdPhOAc\_CP\_C3:**

E(wB97XD/6-31G(d)&LANL2DZ) = -1381.20939986  
ZPE(wB97XD/6-31G(d)&LANL2DZ) = 0.253553  
H(wB97XD/6-31G(d)&LANL2DZ) = -1380.922879  
G(wB97XD/6-31G(d)&LANL2DZ) = -1381.016769

Pd -0.311706 0.791712 -0.563409  
C -2.602158 -0.136094 0.053969  
O -1.801536 -0.734578 -0.725873  
O -2.374490 0.962806 0.588483  
C -3.915511 -0.874459 0.369810  
C 1.645075 1.828030 -0.102031

C 1.701767 1.956087 1.307191  
C 0.907150 2.792537 -0.835613  
C 1.043140 2.992206 1.940465  
H 2.281575 1.249490 1.888751  
C 0.248016 3.844683 -0.169719  
H 0.965060 2.812553 -1.920902  
C 0.308608 3.936045 1.206173  
H 1.097073 3.074898 3.021056  
H -0.301381 4.577251 -0.751175  
H -0.206507 4.739790 1.721710  
C 2.361544 0.714511 -0.897205  
C 1.191198 0.074230 -1.658839  
H 3.108703 1.154985 -1.568634  
H 1.050787 0.455681 -2.671986  
C 2.518148 -1.584191 0.201330  
C 1.534325 -2.043087 -0.681464  
C 0.976047 -3.310055 -0.536414  
C 2.954634 -2.427085 1.232435  
C 2.404435 -3.686890 1.387237  
H 2.735997 -4.334235 2.192123  
C 1.412993 -4.121939 0.499481  
H 0.971669 -5.106096 0.623377  
H 0.203077 -3.624342 -1.228147  
H 3.726695 -2.058679 1.900330  
C 3.101978 -0.245289 0.030068  
O 4.102578 0.126670 0.613449  
O 1.123160 -1.302355 -1.746574  
F -4.419020 -1.456261 -0.723476  
F -3.682784 -1.833641 1.280263  
F -4.836008 -0.047414 0.864676

**10**, Chromone\_PdPhOAc\_CP\_C2:  
E(wB97XD/6-31G(d)&LANL2DZ) = -1381.20772888  
ZPE(wB97XD/6-31G(d)&LANL2DZ) = 0.253331  
H(wB97XD/6-31G(d)&LANL2DZ) = -1380.92145  
G(wB97XD/6-31G(d)&LANL2DZ) = -1381.015047

Pd -0.421751 0.647893 -0.577270  
C -2.547926 -0.502326 0.083598  
O -1.718936 -1.038102 -0.707917  
O -2.385259 0.629244 0.587231  
C -3.792033 -1.318969 0.472452  
C 1.305364 2.021749 -0.172033  
C 1.416287 2.060736 1.238513  
C 0.360651 2.863655 -0.807585  
C 0.610997 2.907663 1.973065  
H 2.144315 1.424452 1.728200  
C -0.446815 3.725578 -0.039702  
H 0.345537 2.943589 -1.891852  
C -0.325528 3.739014 1.335474  
H 0.701562 2.929431 3.054171

H -1.160364 4.371538 -0.539481  
H -0.955561 4.392629 1.929559  
C 2.205454 1.132347 -1.049631  
C 1.196365 0.191773 -1.714135  
H 2.737383 1.746777 -1.781902  
H 0.948864 0.455223 -2.744689  
C 3.032873 -0.725420 0.236113  
C 2.175911 -1.660897 -0.352478  
C 1.395948 -1.278508 -1.549490  
O 0.919847 -2.087370 -2.323065  
O 3.220453 0.525705 -0.274915  
C 2.086010 -2.946591 0.187062  
C 3.797559 -1.071284 1.349136  
C 3.687585 -2.351037 1.877349  
H 4.278878 -2.617475 2.748458  
C 2.829377 -3.293485 1.304154  
H 2.747648 -4.287862 1.730023  
H 1.415322 -3.651434 -0.294025  
H 4.471815 -0.335449 1.775097  
F -4.106172 -2.211782 -0.464859  
F -3.549770 -1.976574 1.616438  
F -4.843190 -0.519901 0.666088

**10** + AcOH, Chromone\_PdPhOAc\_CP\_C3\_AcOH:  
E(wB97XD/6-31G(d)&LANL2DZ) = -1610.24395404  
ZPE(wB97XD/6-31G(d)&LANL2DZ) = 0.318727  
H(wB97XD/6-31G(d)&LANL2DZ) = -1609.897157  
G(wB97XD/6-31G(d)&LANL2DZ) = -1609.987166

C -2.679614 0.586026 -0.631144  
O -2.114720 -0.486536 -0.276220  
O -2.100533 1.693132 -0.655226  
C -4.149992 0.481873 -1.070163  
C 1.008947 -0.758994 0.939798  
C 1.948527 0.247088 1.586050  
H 0.364041 -1.332974 1.614425  
H 1.819952 0.245209 2.670123  
C 2.943126 -1.324732 -0.569433  
C 3.761870 -0.505373 0.223053  
C 5.090188 -0.279254 -0.141622  
C 3.471699 -1.908605 -1.727885  
C 4.784185 -1.676038 -2.099916  
H 5.187189 -2.124865 -3.001448  
C 5.590207 -0.862206 -1.296328  
H 6.623338 -0.679321 -1.576423  
H 5.704957 0.352038 0.490512  
H 2.820359 -2.547246 -2.315874  
C 1.561256 -1.611991 -0.142643  
O 0.912221 -2.525238 -0.646090  
F -4.232066 -0.170835 -2.235175  
F -4.863432 -0.197360 -0.160733  
F -4.702417 1.683436 -1.219774

C -2.022826 -2.945015 1.310979  
O -1.307241 -2.388610 2.124951  
O -1.603684 -3.396001 0.136641  
H -0.686574 -3.078741 -0.038067  
C -3.495691 -3.173429 1.514495  
H -4.027342 -2.377251 0.983729  
H -3.808732 -4.130788 1.092186  
H -3.737270 -3.119379 2.576559  
Pd -0.288625 0.573116 0.118313  
C 1.467966 1.594215 1.035353  
C 0.932001 2.588064 1.894724  
C 1.594171 1.887176 -0.347137  
C 0.543625 3.811526 1.393007  
H 0.834511 2.370710 2.954343  
C 1.204556 3.150502 -0.837102  
H 2.112928 1.201699 -1.010551  
C 0.679174 4.093509 0.021322  
H 0.132211 4.562073 2.059860  
H 1.318340 3.365386 -1.893923  
H 0.365855 5.059338 -0.361277  
O 3.343201 0.061697 1.381206

**TS-11**, Chromone\_PdPhOAc\_CP\_C3\_PDM\_TFA\_TS:  
E(wB97XD/6-31G(d)&LANL2DZ) = -1907.82956968  
ZPE(wB97XD/6-31G(d)&LANL2DZ) = 0.290823  
H(wB97XD/6-31G(d)&LANL2DZ) = -1907.495863  
G(wB97XD/6-31G(d)&LANL2DZ) = -1907.615759

Pd 1.805607 0.054781 -0.501351  
C 4.020541 -0.348290 0.374232  
O 3.232009 -1.307318 0.127472  
O 3.660166 0.839102 0.164101  
C 5.400170 -0.646179 0.975760  
C -3.065582 -0.134715 1.897925  
C -2.906510 0.838386 2.885002  
C -4.118698 -0.015127 0.990130  
C -3.775483 1.922935 2.958862  
H -2.094632 0.748699 3.604025  
C -4.990425 1.066790 1.066083  
H -4.265408 -0.765529 0.219617  
C -4.819925 2.040644 2.046489  
H -3.639704 2.672609 3.732821  
H -5.805463 1.149218 0.353127  
H -5.501395 2.884164 2.101734  
C -2.030882 -1.243788 1.788624  
C -0.839742 -0.821897 0.935570  
H -1.670864 -1.473605 2.795802  
H 0.042374 -0.484644 1.481636  
C -2.636707 -2.777962 0.042444  
C -1.696258 -2.256265 -0.857747  
C -0.655694 -1.374755 -0.321154

O 0.338574 -1.119006 -1.111600  
O -2.641494 -2.464931 1.355727  
C -1.734977 -2.641336 -2.201794  
C -3.594026 -3.691210 -0.402572  
C -3.617461 -4.061182 -1.739867  
H -4.369181 -4.767014 -2.080579  
C -2.694008 -3.535960 -2.648382  
H -2.725472 -3.828661 -3.692435  
H -0.994300 -2.229994 -2.879258  
H -4.307297 -4.086944 0.312195  
F 5.906403 -1.757291 0.446875  
F 6.235323 0.363089 0.755710  
F 5.270393 -0.819498 2.295463  
C -0.394122 2.135519 -0.806427  
O -1.316525 1.597337 -0.121197  
O 0.753517 1.741292 -1.054958  
H -1.121849 0.589693 0.293182  
C -0.815898 3.492840 -1.412886  
F 0.203877 4.084626 -2.020460  
F -1.271944 4.294668 -0.451024  
F -1.790782 3.288805 -2.301879

**TS-8**, Chromone\_PdPhOAc\_Heck\_C3\_TS:  
E(wB97XD/6-31G(d)&LANL2DZ) = -1381.16782572  
ZPE(wB97XD/6-31G(d)&LANL2DZ) = 0.250914  
H(wB97XD/6-31G(d)&LANL2DZ) = -1380.883967  
G(wB97XD/6-31G(d)&LANL2DZ) = -1380.977891

Pd -0.662479 0.102312 -0.520189  
C -3.053939 -0.352098 0.147342  
O -2.420730 -1.173023 -0.572913  
O -2.566269 0.709423 0.590566  
C -4.529182 -0.658581 0.461102  
C 0.708290 1.582713 -0.124648  
C 1.247160 1.463509 1.160864  
C 0.514101 2.838407 -0.701790  
C 1.538968 2.614041 1.885546  
H 1.429913 0.486472 1.597811  
C 0.815544 3.981183 0.032607  
H 0.117428 2.928482 -1.708411  
C 1.328763 3.870632 1.322158  
H 1.939892 2.525208 2.890532  
H 0.653294 4.959241 -0.409435  
H 1.572232 4.765474 1.886328  
C 1.396369 0.298512 -1.571674  
C 0.711586 -0.953334 -1.620613  
H 1.234867 0.961588 -2.415709  
H 0.143591 -1.253672 -2.497549  
C 3.127266 -0.845525 -0.192861  
C 2.271258 -1.951916 -0.155274  
C 2.544371 -3.040190 0.672054

C 4.279423 -0.848361 0.603337  
C 4.556715 -1.921022 1.431372  
H 5.443589 -1.915259 2.056115  
C 3.682838 -3.015196 1.462396  
H 3.896329 -3.858464 2.111863  
H 1.861203 -3.882280 0.676056  
H 4.930798 0.018443 0.554916  
O 1.168421 -2.056268 -0.951569  
C 2.808792 0.308293 -1.051148  
O 3.593480 1.183850 -1.347427  
F -5.316917 0.071240 -0.343601  
F -4.819986 -1.945867 0.270213  
F -4.822905 -0.345355 1.725864

**TS-9, Chromone\_PdPhOAc\_Heck\_C2\_TS:**

E(wB97XD/6-31G(d)&LANL2DZ) = -1381.17221909  
ZPE(wB97XD/6-31G(d)&LANL2DZ) = 0.25111  
H(wB97XD/6-31G(d)&LANL2DZ) = -1380.888164  
G(wB97XD/6-31G(d)&LANL2DZ) = -1380.982298

Pd -0.328401 0.372108 -0.589757  
C -2.597691 -0.324912 0.184085  
O -1.989669 -1.013579 -0.679782  
O -2.123449 0.714923 0.696664  
C -4.009418 -0.783370 0.587673  
C 0.891999 1.985322 -0.182552  
C 1.305038 2.113236 1.145374  
C 0.573984 3.121476 -0.935219  
C 1.345063 3.372773 1.734191  
H 1.581764 1.233130 1.718596  
C 0.616029 4.378059 -0.339693  
H 0.291069 3.024125 -1.980642  
C 0.999292 4.502321 0.994353  
H 1.645155 3.473618 2.772705  
H 0.354587 5.259519 -0.917259  
H 1.037710 5.483606 1.457110  
C 2.058806 0.634774 -1.220423  
C 1.156693 -0.273883 -1.865909  
H 2.468945 1.468439 -1.774864  
H 0.836089 -0.018847 -2.875103  
C 2.779636 -1.018891 0.288140  
C 1.983662 -2.007790 -0.293226  
C 1.270041 -1.725435 -1.562250  
O 0.801875 -2.589798 -2.275146  
O 2.952126 0.212050 -0.300332  
C 1.893064 -3.255168 0.329560  
C 3.476307 -1.248355 1.470055  
C 3.361434 -2.490161 2.080018  
H 3.893309 -2.677564 3.007501  
C 2.569970 -3.495145 1.514480  
H 2.486166 -4.459604 2.003917  
H 1.273076 -4.012339 -0.139220

H 4.093213 -0.459111 1.886054  
F -4.048100 -2.107502 0.760226  
F -4.878800 -0.462222 -0.381244  
F -4.409231 -0.200254 1.717333

**5, Chromone\_PdPhOAc\_pi:**

E(wB97XD/6-31G(d)&LANL2DZ) = -1381.19806632  
ZPE(wB97XD/6-31G(d)&LANL2DZ) = 0.251738  
H(wB97XD/6-31G(d)&LANL2DZ) = -1380.912452  
G(wB97XD/6-31G(d)&LANL2DZ) = -1381.008865

Pd -0.790259 -0.238961 0.237397  
C -3.281121 -0.060271 -0.056813  
O -2.861372 -1.214880 0.177281  
O -2.533910 0.956322 -0.147574  
C -4.785631 0.164519 -0.290754  
C 0.596300 1.146723 0.124416  
C 1.033762 1.769457 1.287677  
C 1.089824 1.514036 -1.122133  
C 2.001029 2.770137 1.196644  
H 0.656643 1.467107 2.260413  
C 2.062256 2.510503 -1.199636  
H 0.738880 1.025515 -2.027170  
C 2.520784 3.134418 -0.042333  
H 2.353886 3.255157 2.102062  
H 2.461523 2.795213 -2.168775  
H 3.282076 3.905857 -0.106428  
C 0.496724 -2.044808 -0.374492  
C 0.632582 -1.748535 0.974590  
H -0.313385 -2.646010 -0.775720  
H -0.040185 -2.209416 1.693597  
C 2.639528 -1.263533 -0.907199  
C 2.917667 -0.952255 0.424317  
C 1.925100 -1.229127 1.484179  
O 2.139025 -1.058724 2.669521  
O 1.446886 -1.833456 -1.291231  
C 4.140505 -0.345821 0.728089  
C 3.550435 -1.004628 -1.925614  
C 4.756915 -0.405165 -1.599725  
H 5.474089 -0.190552 -2.385718  
C 5.053711 -0.069283 -0.273977  
H 5.996844 0.410701 -0.035393  
H 4.334770 -0.094709 1.765399  
H 3.295396 -1.261948 -2.947679  
F -5.504128 -0.877579 0.123303  
F -5.010668 0.336904 -1.601428  
F -5.209190 1.254341 0.353435

**Benzoquinone**

E(wB97XD/6-31G(d)&LANL2DZ) = -381.3147464  
ZPE(wB97XD/6-31G(d)&LANL2DZ) = 0.08655

H(wB97XD/6-31G(d)&LANL2DZ) = -381.217769  
G(wB97XD/6-31G(d)&LANL2DZ) = -381.254925

|   |            |            |            |
|---|------------|------------|------------|
| C | 0.6687742  | -1.2699605 | 0.0000981  |
| C | -0.6687758 | -1.2699655 | 0.0000431  |
| C | -0.6687668 | 1.2699655  | 0.0000531  |
| C | 0.6687702  | 1.2699685  | 0.0000921  |
| H | 1.2547232  | -2.1843145 | 0.0001841  |
| H | -1.2547248 | -2.1843195 | 0.0001311  |
| H | -1.2547318 | 2.1843095  | 0.0001311  |
| H | 1.2547342  | 2.1843135  | 0.0001671  |
| C | 1.4441552  | -0.0000005 | -0.0000519 |
| O | 2.6611512  | 0.0000025  | -0.0003899 |
| C | -1.4441568 | -0.0000095 | -0.0001179 |
| O | -2.6611518 | 0.0000105  | -0.0003399 |

Benzoquinone\_COlp  
E(wB97XD/6-31G(d)&LANL2DZ) = -1560.152535  
ZPE(wB97XD/6-31G(d)&LANL2DZ) = 0.146953  
H(wB97XD/6-31G(d)&LANL2DZ) = -1559.982366  
G(wB97XD/6-31G(d)&LANL2DZ) = -1560.063018

|    |            |            |            |
|----|------------|------------|------------|
| Pd | 1.3139553  | 0.3594195  | -0.8689046 |
| C  | 3.5528203  | -0.5167875 | -0.6501336 |
| O  | 2.5820563  | -1.3114545 | -0.8007486 |
| O  | 3.3528713  | 0.7279455  | -0.6108306 |
| C  | 4.9704433  | -1.0759245 | -0.4720836 |
| C  | -1.8153947 | -1.7422555 | 1.8361014  |
| C  | -0.9480547 | -1.1682535 | 0.9949624  |
| H  | -1.5586607 | -1.9739475 | 2.8644354  |
| H  | 0.0570873  | -0.8897615 | 1.2922184  |
| C  | -3.5820647 | -1.7706485 | 0.0071374  |
| C  | -2.7092487 | -1.2102105 | -0.8370016 |
| C  | -1.3457607 | -0.8815045 | -0.3909246 |
| O  | -0.5774277 | -0.3873455 | -1.2302986 |
| F  | 5.1441793  | -2.1440555 | -1.2468086 |
| F  | 5.1354703  | -1.4407465 | 0.8039374  |
| F  | 5.8803413  | -0.1591985 | -0.7786586 |
| C  | -0.3493347 | 2.4639345  | -0.0499186 |
| O  | 0.5516333  | 2.1865035  | -0.9320226 |
| O  | -0.7960767 | 1.7490035  | 0.8285694  |
| C  | -0.9002477 | 3.8965275  | -0.2462956 |
| F  | -1.6464957 | 4.2638965  | 0.7925594  |
| F  | 0.0847253  | 4.7853405  | -0.3954726 |
| F  | -1.6677377 | 3.9315245  | -1.3470226 |
| H  | -2.9502147 | -0.9637825 | -1.8655726 |
| H  | -4.5975327 | -2.0211375 | -0.2819046 |
| C  | -3.1985137 | -2.0901365 | 1.4110234  |
| O  | -3.9828167 | -2.6169455 | 2.1736584  |

Benzoquinone\_pi  
E(wB97XD/6-31G(d)&LANL2DZ) = -1560.149886

ZPE(wB97XD/6-31G(d)&LANL2DZ) = 0.147  
H(wB97XD/6-31G(d)&LANL2DZ) = -1559.980021  
G(wB97XD/6-31G(d)&LANL2DZ) = -1560.058432

|    |            |            |            |
|----|------------|------------|------------|
| Pd | 0.9032603  | -0.0124461 | -0.2938447 |
| C  | 3.2952343  | 0.4216579  | -0.0813357 |
| O  | 2.7907323  | -0.7356331 | 0.0946983  |
| O  | 2.5686773  | 1.3917379  | -0.3921157 |
| C  | 4.8085103  | 0.5878819  | 0.1200663  |
| C  | -0.0470717 | -1.7470161 | 0.7056123  |
| C  | -0.1844947 | -1.8908691 | -0.6638817 |
| H  | 0.8177443  | -2.1380281 | 1.2374143  |
| H  | 0.5488953  | -2.4259221 | -1.2644037 |
| C  | -2.5071227 | -1.1124631 | 0.8817573  |
| C  | -2.6398347 | -1.2324251 | -0.4456597 |
| C  | -1.5215457 | -1.6612181 | -1.3210737 |
| O  | -1.6610117 | -1.8771021 | -2.5046477 |
| F  | 5.4593723  | -0.3364121 | -0.5868207 |
| F  | 5.0991853  | 0.4233559  | 1.4121903  |
| F  | 5.2039563  | 1.7927679  | -0.2658917 |
| C  | -1.2562707 | 1.6686649  | 0.1119533  |
| O  | -0.6931557 | 1.0156089  | -0.8600567 |
| O  | -0.9830927 | 1.6042889  | 1.2917503  |
| C  | -2.4162977 | 2.5505939  | -0.4038777 |
| F  | -3.4086997 | 1.7666339  | -0.8588837 |
| F  | -2.9000807 | 3.3106129  | 0.5710063  |
| F  | -2.0144987 | 3.3361779  | -1.4041077 |
| C  | -1.2307557 | -1.4068361 | 1.5739173  |
| O  | -1.1276437 | -1.4620921 | 2.7788223  |
| H  | -3.5755227 | -1.0258151 | -0.9536157 |
| H  | -3.3284697 | -0.8057051 | 1.5210283  |

**TS-15, Benzoquinone\_CMD**  
E(wB97XD/6-31G(d)&LANL2DZ) = -1560.11343  
ZPE(wB97XD/6-31G(d)&LANL2DZ) = 0.141405  
H(wB97XD/6-31G(d)&LANL2DZ) = -1559.939287  
G(wB97XD/6-31G(d)&LANL2DZ) = -1560.036992

|    |            |            |            |
|----|------------|------------|------------|
| Pd | -0.5903063 | 0.8769410  | -0.0915484 |
| O  | -2.5444613 | 0.3870600  | 0.1166326  |
| C  | -2.9137123 | -0.8099040 | -0.0202644 |
| O  | -2.1852583 | -1.8105670 | -0.1686204 |
| C  | -4.4450463 | -1.0107550 | -0.0216414 |
| H  | -0.9256103 | -1.3379480 | -0.0703764 |
| C  | 0.3119307  | -1.0242040 | 0.1655946  |
| C  | 0.6908317  | -1.2947350 | 1.4346006  |
| H  | 0.0392927  | -1.1123940 | 2.2860996  |
| C  | 2.9288887  | -2.1754140 | 0.6235356  |
| C  | 2.5603547  | -1.9315740 | -0.6396924 |
| C  | 1.2422257  | -1.3296520 | -0.9710764 |
| O  | 0.9295057  | -1.0891740 | -2.1202124 |
| F  | -4.9902133 | -0.3730110 | 1.0129486  |



|   |            |            |            |
|---|------------|------------|------------|
| F | -4.7593923 | -2.2979640 | 0.0526226  |
| F | -4.9443343 | -0.5072260 | -1.1517654 |
| C | 0.6412687  | 2.9356460  | -0.4919854 |
| O | 1.2230727  | 1.8132390  | -0.3573334 |
| O | -0.6056023 | 3.0234430  | -0.4151034 |
| C | 1.5132487  | 4.1720840  | -0.7531274 |
| F | 0.7715777  | 5.2705720  | -0.8097254 |
| F | 2.4111877  | 4.3016490  | 0.2261316  |
| F | 2.1622987  | 4.0232670  | -1.9097414 |
| C | 2.0304817  | -1.8738960 | 1.7627206  |
| O | 2.3473907  | -2.0777110 | 2.9179856  |
| H | 3.2057007  | -2.1477150 | -1.4856454 |
| H | 3.8946797  | -2.6000560 | 0.8789876  |

**16(C2)**

E(wB97XD/6-31G(d)&LANL2DZ) = -1530.350821  
ZPE(wB97XD/6-31G(d)&LANL2DZ) = 0.236756  
H(wB97XD/6-31G(d)&LANL2DZ) = -1530.089133  
G(wB97XD/6-31G(d)&LANL2DZ) = -1530.173199

|    |            |            |            |
|----|------------|------------|------------|
| Pd | 2.0958384  | -1.1658357 | -0.2662514 |
| C  | 3.6951464  | -3.0260717 | 0.1445706  |
| O  | 2.4289044  | -3.1583807 | 0.1811856  |
| O  | 4.2499334  | -1.9437797 | -0.1165524 |
| C  | 4.5425454  | -4.2595837 | 0.4957196  |
| C  | 1.5338884  | 3.1195253  | -0.9456524 |
| C  | 0.7408164  | 1.6914223  | 0.9986446  |
| C  | 0.7894504  | 4.1395823  | -0.5034404 |
| H  | 2.1520234  | 3.1769103  | -1.8355604 |
| C  | -0.0011206 | 2.7109913  | 1.4452816  |
| H  | 0.7903674  | 0.7369233  | 1.5145796  |
| H  | 0.7594464  | 5.1015953  | -1.0049844 |
| H  | -0.5962586 | 2.6436023  | 2.3499826  |
| C  | 0.1521314  | -1.2340897 | -0.1946374 |
| C  | -0.5283136 | -2.2156857 | 0.4295556  |
| C  | -1.8010846 | -0.0185887 | -0.6950944 |
| C  | -2.6013706 | -0.9660557 | -0.0616224 |
| C  | -1.9884636 | -2.1792897 | 0.5356506  |
| O  | -2.6513326 | -3.0443737 | 1.0862426  |
| C  | -3.9810386 | -0.7367337 | 0.0043326  |
| C  | -2.3353776 | 1.1432553  | -1.2519094 |
| C  | -3.7029696 | 1.3499983  | -1.1712584 |
| H  | -4.1326256 | 2.2497383  | -1.6009534 |
| C  | -4.5302276 | 0.4094973  | -0.5431944 |
| H  | -5.5999496 | 0.5829723  | -0.4879244 |
| H  | -4.5914186 | -1.4858867 | 0.4984636  |
| H  | -1.6753696 | 1.8534743  | -1.7399434 |
| F  | 3.8970534  | -5.3890247 | 0.2101766  |
| F  | 4.8120214  | -4.2459397 | 1.8084606  |
| F  | 5.6954934  | -4.2442517 | -0.1707654 |
| O  | -0.4446386 | -0.1752127 | -0.7906024 |
| C  | 1.5063044  | 1.8183183  | -0.2536994 |

|   |            |            |            |
|---|------------|------------|------------|
| O | 2.1175104  | 0.8742073  | -0.7664324 |
| C | -0.0538636 | 4.0083303  | 0.7179226  |
| O | -0.7477556 | 4.9262153  | 1.1060476  |
| H | 0.0043044  | -3.0477747 | 0.8736606  |

**17(C3)**

E(wB97XD/6-31G(d)&LANL2DZ) = -1530.353537  
ZPE(wB97XD/6-31G(d)&LANL2DZ) = 0.237203  
H(wB97XD/6-31G(d)&LANL2DZ) = -1530.079869  
G(wB97XD/6-31G(d)&LANL2DZ) = -1530.183322

|    |            |            |            |
|----|------------|------------|------------|
| Pd | 1.8257604  | -0.9555393 | -0.3419341 |
| C  | 3.4797624  | -2.6582483 | 0.4352369  |
| O  | 2.2156934  | -2.8145873 | 0.4855299  |
| O  | 4.0180274  | -1.6307113 | -0.0081811 |
| C  | 4.3288434  | -3.8191703 | 0.9788839  |
| C  | 1.2120654  | 3.1428937  | -1.5522231 |
| C  | 1.7630014  | 2.1476807  | 0.7168209  |
| C  | 1.1299254  | 4.3572237  | -0.9997951 |
| H  | 1.0428524  | 2.9578407  | -2.6075491 |
| C  | 1.7034134  | 3.3642717  | 1.2666799  |
| H  | 1.9862234  | 1.2538787  | 1.2928179  |
| H  | 0.8839384  | 5.2445517  | -1.5742581 |
| H  | 1.8738794  | 3.5322537  | 2.3248619  |
| C  | -0.6255946 | -2.3519183 | -0.3577531 |
| C  | -0.1415586 | -1.0923613 | -0.2871521 |
| H  | 0.0024094  | -3.2334033 | -0.4085781 |
| C  | -2.8611106 | -1.7160343 | -0.2694121 |
| C  | -2.4965856 | -0.3735023 | -0.1627721 |
| C  | -1.0727166 | 0.0276977  | -0.1501851 |
| O  | -0.7661586 | 1.2147607  | -0.0224431 |
| C  | -3.5123866 | 0.5910497  | -0.0696641 |
| C  | -4.2007916 | -2.1123983 | -0.2870991 |
| C  | -5.1819406 | -1.1425933 | -0.1971511 |
| H  | -6.2265156 | -1.4381183 | -0.2111401 |
| C  | -4.8408726 | 0.2144197  | -0.0880411 |
| H  | -5.6212716 | 0.9651017  | -0.0183361 |
| H  | -3.2156356 | 1.6308547  | 0.0163019  |
| H  | -4.4387966 | -3.1670763 | -0.3703411 |
| F  | 3.9634094  | -4.9700723 | 0.4041539  |
| F  | 4.1449594  | -3.9338693 | 2.3003539  |
| F  | 5.6228714  | -3.6211003 | 0.7479329  |
| O  | -1.9279606 | -2.6985803 | -0.3563641 |
| C  | 1.5442844  | 1.9665117  | -0.7297681 |
| O  | 1.7092224  | 0.8826147  | -1.3062431 |
| C  | 1.3736234  | 4.5642017  | 0.4547129  |
| O  | 1.3057304  | 5.6714767  | 0.9520989  |

**18(C2)**

E(wB97XD/6-31G(d)&LANL2DZ) = -1530.352836  
ZPE(wB97XD/6-31G(d)&LANL2DZ) = 0.236419  
H(wB97XD/6-31G(d)&LANL2DZ) = -1530.080065

G(wB97XD/6-31G(d)&LANL2DZ) = -1530.181891

|    |            |            |            |
|----|------------|------------|------------|
| Pd | 1.9955567  | -0.1597038 | -0.3652567 |
| C  | 3.8790687  | -1.7864828 | -0.3842947 |
| O  | 2.6767767  | -2.1766568 | -0.4785827 |
| O  | 4.1970157  | -0.5780278 | -0.2989637 |
| C  | 4.9883887  | -2.8501738 | -0.3217147 |
| C  | -0.6134223 | 2.5925232  | -0.8699907 |
| C  | 1.8601817  | 1.9734932  | -0.9146487 |
| C  | -0.6164913 | 2.5356922  | 0.4679043  |
| H  | -1.5052013 | 2.8252942  | -1.4434107 |
| C  | 1.8501487  | 1.8916822  | 0.4660583  |
| H  | 2.7872667  | 2.0557722  | -1.4793597 |
| H  | -1.5122283 | 2.7183552  | 1.0531243  |
| H  | 2.7698667  | 1.8972492  | 1.0483033  |
| C  | 0.0710337  | -0.4526088 | -0.4633127 |
| C  | -0.6042253 | -0.6846418 | -1.6030557 |
| C  | -1.8409073 | -0.5350088 | 0.8851603  |
| C  | -2.6518003 | -0.7698468 | -0.2221417 |
| C  | -2.0590553 | -0.8796868 | -1.5773067 |
| O  | -2.7276793 | -1.0835308 | -2.5766207 |
| C  | -4.0329943 | -0.8852578 | -0.0217847 |
| C  | -2.3583273 | -0.4034688 | 2.1715213  |
| C  | -3.7283753 | -0.5206438 | 2.3428593  |
| H  | -4.1495503 | -0.4220758 | 3.3384473  |
| C  | -4.5688373 | -0.7637278 | 1.2480783  |
| H  | -5.6393183 | -0.8569428 | 1.3990053  |
| H  | -4.6548753 | -1.0697698 | -0.8918257 |
| H  | -1.6853233 | -0.2088078 | 2.9995223  |
| F  | 4.5723797  | -4.0162778 | -0.8070607 |
| F  | 5.3516477  | -3.0239998 | 0.9554493  |
| F  | 6.0553067  | -2.4517468 | -1.0140767 |
| O  | -0.4777683 | -0.4039038 | 0.7567373  |
| C  | 0.6138907  | 2.3456812  | -1.6692517 |
| O  | 0.6405377  | 2.4753332  | -2.8742477 |
| C  | 0.5994367  | 2.1926672  | 1.2460023  |
| O  | 0.6145677  | 2.1889082  | 2.4588863  |
| H  | -0.0966913 | -0.7096608 | -2.5601527 |

**19(C3)**

E(wB97XD/6-31G(d)&LANL2DZ) = -1530.352062

ZPE(wB97XD/6-31G(d)&LANL2DZ) = 0.236904

H(wB97XD/6-31G(d)&LANL2DZ) = -1530.078889

G(wB97XD/6-31G(d)&LANL2DZ) = -1530.180525

|    |            |            |            |
|----|------------|------------|------------|
| Pd | 1.9727559  | -0.0896289 | -0.3653923 |
| C  | 3.7656169  | -1.8160229 | -0.3859373 |
| O  | 2.5411389  | -2.1387549 | -0.4412003 |
| O  | 4.1543549  | -0.6273909 | -0.3330243 |
| C  | 4.8072839  | -2.9470639 | -0.3376043 |
| C  | -0.5525951 | 2.7605041  | -0.5269873 |
| C  | 1.7958819  | 1.9703561  | -1.1218423 |

|   |            |            |            |
|---|------------|------------|------------|
| C | -0.2141381 | 2.8371401  | 0.7660507  |
| H | -1.5543321 | 2.9867041  | -0.8788273 |
| C | 2.1367009  | 2.0279291  | 0.2185517  |
| H | 2.5487639  | 1.9339361  | -1.9070253 |
| H | -0.9203081 | 3.1295051  | 1.5360857  |
| H | 3.1755479  | 2.0158411  | 0.5436137  |
| C | -0.6115651 | -0.7146029 | -1.5293483 |
| C | 0.0195339  | -0.3444289 | -0.4005933 |
| C | -2.6762121 | -0.9499219 | -0.4721113 |
| C | -2.1278331 | -0.5831539 | 0.7596027  |
| C | -0.6934111 | -0.2546019 | 0.8679957  |
| O | -0.1666611 | 0.0915321  | 1.9212317  |
| C | -2.9694731 | -0.5192559 | 1.8803277  |
| C | -4.0324301 | -1.2546049 | -0.6033233 |
| C | -4.8415811 | -1.1844979 | 0.5163307  |
| H | -5.8980151 | -1.4169599 | 0.4251837  |
| C | -4.3136401 | -0.8148299 | 1.7628147  |
| H | -4.9626061 | -0.7630389 | 2.6308297  |
| H | -2.5266521 | -0.2314249 | 2.8282717  |
| H | -4.4197041 | -1.5383349 | -1.5756523 |
| F | 4.3538799  | -4.0449819 | -0.9404213 |
| F | 5.0749309  | -3.2431399 | 0.9401277  |
| F | 5.9392029  | -2.5702619 | -0.9306893 |
| O | -1.9216521 | -1.0209619 | -1.6039123 |
| C | 0.4169209  | 2.3595301  | -1.5757783 |
| O | 0.1356249  | 2.3661081  | -2.7571853 |
| C | 1.1657759  | 2.5547391  | 1.2372597  |
| O | 1.5409009  | 2.8304061  | 2.3551377  |
| H | -0.1420071 | -0.7963659 | -2.5025583 |

**TS-13**

E(wB97XD/6-31G(d)&LANL2DZ) = -1530.326472

ZPE(wB97XD/6-31G(d)&LANL2DZ) = 0.235665

H(wB97XD/6-31G(d)&LANL2DZ) = -1530.055368

G(wB97XD/6-31G(d)&LANL2DZ) = -1530.156458

|    |            |            |            |
|----|------------|------------|------------|
| Pd | -1.2425842 | -1.0602661 | -1.0412356 |
| C  | -3.5062612 | -1.4981461 | -0.1334886 |
| O  | -2.9380842 | -2.3426961 | -0.8827206 |
| O  | -2.9694922 | -0.4131421 | 0.1896934  |
| C  | -4.9281182 | -1.8055401 | 0.3644894  |
| C  | 0.0802548  | 0.4872119  | -0.7893036 |
| C  | -0.1348482 | 1.6785019  | -1.3853536 |
| C  | 0.9786118  | 1.4619459  | 1.1470234  |
| H  | -0.5373412 | 1.7288069  | -2.3901436 |
| C  | 0.7730778  | 2.7458969  | 0.6435214  |
| C  | 0.8863788  | -0.8481611 | -2.0255776 |
| C  | 0.1268808  | -2.0484831 | -2.2152476 |
| H  | 0.9424128  | -0.1613511 | -2.8641786 |
| H  | -0.3716812 | -2.2147791 | -3.1695656 |
| C  | 2.3867058  | -2.1184311 | -0.3852146 |
| C  | 1.6029748  | -3.1990271 | -0.4831306 |

|                                           |            |            |            |
|-------------------------------------------|------------|------------|------------|
| C                                         | 2.2033128  | -0.9391391 | -1.2607516 |
| O                                         | 3.0538028  | -0.0933381 | -1.4129656 |
| F                                         | -5.8173692 | -1.2556191 | -0.4730046 |
| F                                         | -5.1490422 | -3.1176671 | 0.4123934  |
| F                                         | -5.1222892 | -1.2948561 | 1.5800914  |
| C                                         | 1.5492208  | 1.2445979  | 2.3989834  |
| C                                         | 1.9249858  | 2.3433839  | 3.1535244  |
| C                                         | 1.7341608  | 3.6446359  | 2.6690454  |
| C                                         | 1.1625548  | 3.8405899  | 1.4253004  |
| H                                         | 1.6823418  | 0.2291239  | 2.7556154  |
| H                                         | 2.3710608  | 2.1911209  | 4.1313064  |
| H                                         | 2.0331888  | 4.4951619  | 3.2725754  |
| H                                         | 0.9981988  | 4.8335239  | 1.0197154  |
| H                                         | 1.7628268  | -4.0849071 | 0.1240044  |
| H                                         | 3.2257908  | -2.0689941 | 0.3017374  |
| C                                         | 0.5142488  | -3.3028301 | -1.4947906 |
| O                                         | -0.0101332 | -4.3673831 | -1.7464786 |
| C                                         | 0.1641268  | 2.9367449  | -0.6906186 |
| O                                         | -0.0522712 | 4.0315239  | -1.1816816 |
| O                                         | 0.6223978  | 0.3419869  | 0.4364304  |
| <b>TS-14</b>                              |            |            |            |
| E(wB97XD/6-31G(d)&LANL2DZ) = -1530.332655 |            |            |            |
| ZPE(wB97XD/6-31G(d)&LANL2DZ) = 0.236854   |            |            |            |
| H(wB97XD/6-31G(d)&LANL2DZ) = -1530.060628 |            |            |            |
| G(wB97XD/6-31G(d)&LANL2DZ) = -1530.159105 |            |            |            |
| Pd                                        | -1.1488591 | -1.3631943 | -0.3901736 |
| C                                         | -3.4606431 | -1.5087543 | 0.4945314  |
| O                                         | -3.0116001 | -2.4406313 | -0.2244356 |
| O                                         | -2.7768461 | -0.5027023 | 0.8092274  |
| C                                         | -4.9136761 | -1.5790083 | 0.9917114  |
| C                                         | 0.2941029  | 0.0675177  | -0.1784066 |
| C                                         | 0.8767979  | 0.0907837  | 1.0447294  |
| C                                         | 0.6442779  | 2.5047797  | -0.2540786 |
| H                                         | 1.0252469  | -0.7855723 | 1.6663124  |
| C                                         | 1.2107179  | 2.3974137  | 1.0171454  |
| C                                         | 0.9062889  | -1.3923613 | -1.5595306 |
| C                                         | 0.0649459  | -2.5332573 | -1.6095936 |
| H                                         | 0.8400989  | -0.6651743 | -2.3652236 |
| H                                         | -0.5788141 | -2.6944043 | -2.4735276 |
| C                                         | 2.4788079  | -2.6463883 | 0.0062964  |
| C                                         | 1.6191599  | -3.6720733 | 0.0575314  |
| C                                         | 2.2822079  | -1.5229703 | -0.9429196 |
| O                                         | 3.1795349  | -0.7740143 | -1.2599466 |
| F                                         | -5.6579091 | -0.6880783 | 0.3248184  |
| F                                         | -5.4356621 | -2.7885983 | 0.8065914  |
| F                                         | -4.9721551 | -1.2840433 | 2.2934634  |
| C                                         | 0.5470549  | 3.7746187  | -0.8404256 |
| C                                         | 1.0044849  | 4.8914237  | -0.1668316 |
| C                                         | 1.5705769  | 4.7567557  | 1.1087024  |

|                                           |            |            |            |
|-------------------------------------------|------------|------------|------------|
| C                                         | 1.6785429  | 3.5136657  | 1.7081954  |
| H                                         | 0.1052819  | 3.8441767  | -1.8288186 |
| H                                         | 0.9259399  | 5.8726637  | -0.6228316 |
| H                                         | 1.9301659  | 5.6345217  | 1.6362084  |
| H                                         | 2.1121939  | 3.3854177  | 2.6936204  |
| H                                         | 1.7799339  | -4.5286743 | 0.7056064  |
| H                                         | 3.3889689  | -2.6183663 | 0.5981674  |
| C                                         | 0.4376379  | -3.7653213 | -0.8499856 |
| O                                         | -0.1691241 | -4.8084613 | -0.9775476 |
| C                                         | 0.1659819  | 1.3038517  | -0.9650656 |
| O                                         | -0.2846611 | 1.3345037  | -2.1017176 |
| O                                         | 1.3409989  | 1.1899567  | 1.6481994  |
| <b>20(c2)</b>                             |            |            |            |
| E(wB97XD/6-31G(d)&LANL2DZ) = -1530.377762 |            |            |            |
| ZPE(wB97XD/6-31G(d)&LANL2DZ) = 0.238141   |            |            |            |
| H(wB97XD/6-31G(d)&LANL2DZ) = -1530.104181 |            |            |            |
| G(wB97XD/6-31G(d)&LANL2DZ) = -1530.204689 |            |            |            |
| Pd                                        | 1.1667082  | 0.1316773  | -0.8974132 |
| C                                         | 2.8491482  | -1.3072837 | 0.2356988  |
| O                                         | 3.0807402  | -0.0811897 | 0.0231918  |
| O                                         | 1.7759062  | -1.8621847 | -0.0903492 |
| C                                         | 3.9622162  | -2.1502657 | 0.8797208  |
| C                                         | -0.9700848 | 0.9183063  | -0.9455712 |
| C                                         | -0.7278758 | -0.0083127 | -1.9601512 |
| C                                         | -2.0799118 | -0.6637267 | 0.3882508  |
| H                                         | -0.4437238 | 0.3369543  | -2.9504002 |
| C                                         | -1.9162318 | -1.6752287 | -0.5585082 |
| C                                         | -0.4813388 | 2.3535683  | -1.0740192 |
| C                                         | 0.9989122  | 2.1079773  | -1.4068392 |
| H                                         | -1.0268008 | 2.8597323  | -1.8777112 |
| H                                         | 1.2310432  | 2.1665863  | -2.4722632 |
| C                                         | 0.3588522  | 3.4363483  | 1.1220618  |
| C                                         | 1.6390052  | 3.2861633  | 0.7575588  |
| C                                         | -0.7671318 | 3.1464803  | 0.2089238  |
| O                                         | -1.8960438 | 3.5159933  | 0.4482428  |
| F                                         | 4.7376952  | -2.6675067 | -0.0815352 |
| F                                         | 4.7241112  | -1.4075677 | 1.6823968  |
| F                                         | 3.4467242  | -3.1531417 | 1.5903578  |
| C                                         | -2.6928308 | -0.8946697 | 1.6136428  |
| C                                         | -3.1422968 | -2.1761467 | 1.8954838  |
| C                                         | -2.9859318 | -3.2109007 | 0.9661238  |
| C                                         | -2.3813408 | -2.9585117 | -0.2531522 |
| H                                         | -2.8051378 | -0.0760687 | 2.3157078  |
| H                                         | -3.6199088 | -2.3740267 | 2.8497468  |
| H                                         | -3.3364828 | -4.2094277 | 1.2040118  |
| H                                         | -2.2461228 | -3.7371447 | -0.9964672 |
| H                                         | 2.4585382  | 3.5622173  | 1.4144888  |
| H                                         | 0.0797312  | 3.8411333  | 2.0905498  |
| C                                         | 2.0301192  | 2.8304173  | -0.6050902 |
| O                                         | 3.1479352  | 3.0415533  | -1.0314632 |

|   |            |            |            |
|---|------------|------------|------------|
| C | -1.2872978 | -1.3797007 | -1.8632422 |
| O | -1.2274398 | -2.1717447 | -2.7826042 |
| O | -1.6534528 | 0.6296423  | 0.1606208  |

**21 (C3)**

E(wB97XD/6-31G(d)&LANL2DZ) = -1530.381149  
 ZPE(wB97XD/6-31G(d)&LANL2DZ) = 0.238559  
 H(wB97XD/6-31G(d)&LANL2DZ) = -1530.107166  
 G(wB97XD/6-31G(d)&LANL2DZ) = -1530.207569

|    |            |            |            |
|----|------------|------------|------------|
| Pd | 1.2079734  | 0.1913156  | -0.0800163 |
| C  | 2.7389894  | -1.7418954 | 0.3090327  |
| O  | 3.1656514  | -0.6584474 | -0.1829143 |
| O  | 1.5484134  | -1.9146244 | 0.6551267  |
| C  | 3.7428444  | -2.8997324 | 0.4398037  |
| C  | -0.7566966 | 1.0422366  | -0.4174003 |
| C  | -0.7470866 | 0.7598416  | 0.9433007  |
| C  | -2.0422246 | -1.0657514 | -0.6953593 |
| H  | -0.4163696 | 1.4654676  | 1.6995997  |
| C  | -1.9379626 | -1.2368794 | 0.6874537  |
| C  | -0.1756786 | 2.3540006  | -0.9511113 |
| C  | 1.3137194  | 2.0430176  | -0.9183213 |
| H  | -0.5524186 | 2.4699146  | -1.9713493 |
| H  | 1.7675084  | 1.8393296  | -1.8910543 |
| C  | 0.2690644  | 4.1650866  | 0.8290197  |
| C  | 1.5670074  | 3.8347826  | 0.8858387  |
| C  | -0.6743886 | 3.5349856  | -0.1235373 |
| O  | -1.8287306 | 3.9002926  | -0.2023763 |
| F  | 3.9386064  | -3.4553224 | -0.7635343 |
| F  | 4.9165754  | -2.4599864 | 0.8960617  |
| F  | 3.2905814  | -3.8401554 | 1.2677417  |
| C  | -2.6805016 | -2.0595024 | -1.4486743 |
| C  | -3.1885086 | -3.1866024 | -0.8294253 |
| C  | -3.0669946 | -3.3357854 | 0.5580397  |
| C  | -2.4439346 | -2.3646644 | 1.3249697  |
| H  | -2.7550816 | -1.9151074 | -2.5213233 |
| H  | -3.6777636 | -3.9568744 | -1.4159233 |
| H  | -3.4628476 | -4.2223844 | 1.0428687  |
| H  | -2.3343696 | -2.4613714 | 2.3990517  |
| H  | 2.2471714  | 4.3170836  | 1.5827017  |
| H  | -0.1590966 | 4.9248716  | 1.4773667  |
| C  | 2.2079274  | 2.8789106  | -0.0641333 |
| O  | 3.4203814  | 2.8273526  | -0.1414263 |
| C  | -1.4909026 | 0.1364776  | -1.3459923 |
| O  | -1.6035976 | 0.3861716  | -2.5314223 |
| O  | -1.3472586 | -0.2960504 | 1.4973187  |

**Enaminone stationary points:**

Enaminone:

E(wB97XD/6-31G(d)&LANL2DZ) = -516.286390271  
 ZPE(wB97XD/6-31G(d)&LANL2DZ) = 0.171569  
 H(wB97XD/6-31G(d)&LANL2DZ) = -516.099532  
 G(wB97XD/6-31G(d)&LANL2DZ) = -516.147319

|   |           |           |           |
|---|-----------|-----------|-----------|
| C | -2.052089 | 1.120728  | 0.000210  |
| C | -2.218677 | -0.221587 | -0.000156 |
| H | -3.209072 | -0.665041 | -0.000255 |
| C | 0.124769  | -0.666258 | -0.000440 |
| C | 0.377076  | 0.719702  | -0.000162 |
| C | 1.700017  | 1.177327  | 0.000193  |
| H | 1.847898  | 2.252623  | 0.000395  |
| C | 1.207922  | -1.564463 | -0.000407 |
| H | 1.040292  | -2.635311 | -0.000719 |
| C | 2.504870  | -1.082203 | -0.000022 |
| H | 3.329513  | -1.788959 | -0.000001 |
| C | 2.761697  | 0.293275  | 0.000303  |
| H | 3.783563  | 0.658825  | 0.000692  |
| C | -0.726199 | 1.712883  | -0.000022 |
| O | -0.517881 | 2.922150  | 0.000039  |
| N | -1.190299 | -1.123422 | -0.000817 |
| C | -1.470251 | -2.548695 | 0.000750  |
| H | -1.053625 | -3.030014 | -0.890274 |
| H | -1.053982 | -3.028027 | 0.893033  |
| H | -2.550480 | -2.698600 | 0.000637  |
| H | -2.913771 | 1.777000  | 0.000411  |

**TS-17**, Enaminone\_PdChromOC3OAc\_CMD\_opt:  
 E(wB97XD/6-31G(d)&LANL2DZ) = -1400.61122541  
 ZPE(wB97XD/6-31G(d)&LANL2DZ) = 0.288352  
 H(wB97XD/6-31G(d)&LANL2DZ) = -1400.287003  
 G(wB97XD/6-31G(d)&LANL2DZ) = -1400.386926

|    |           |           |           |
|----|-----------|-----------|-----------|
| Pd | 0.566293  | -0.366126 | -0.052471 |
| C  | -1.327209 | 0.123326  | -0.026383 |
| C  | -2.189841 | 1.162347  | -0.002273 |
| C  | -4.089289 | -0.307667 | 0.021820  |
| C  | -3.236587 | -1.438535 | -0.001867 |
| O  | 2.519312  | -1.303654 | -0.061624 |
| C  | 3.520234  | -0.568102 | -0.054233 |
| O  | 3.543856  | 0.693353  | -0.070903 |
| C  | 4.895719  | -1.260967 | 0.042828  |
| H  | -1.867431 | 2.198881  | 0.001190  |
| H  | 2.316112  | 1.092362  | -0.062137 |
| C  | 1.112631  | 1.691700  | -0.030314 |
| C  | 0.881552  | 2.352998  | 1.193740  |
| H  | 1.112780  | 1.839699  | 2.123022  |
| C  | 0.092187  | 4.315057  | 0.042916  |
| C  | 0.326111  | 3.695170  | -1.185237 |
| C  | 0.831975  | 2.400540  | -1.216837 |
| F  | 5.853245  | -0.532664 | -0.532098 |
| F  | 4.873926  | -2.460329 | -0.536382 |

F 5.210403 -1.422970 1.336597  
C 0.375029 3.647001 1.234865  
H 1.022459 1.923738 -2.174276  
H 0.119086 4.224864 -2.110615  
H -0.297834 5.329133 0.071210  
H 0.206192 4.139415 2.188093  
C -3.779566 -2.734602 0.001505  
C -5.484487 -0.518141 0.048128  
C -5.143230 -2.923233 0.027813  
H -5.564164 -3.923082 0.030890  
C -5.989762 -1.802521 0.050880  
H -7.066354 -1.943292 0.072445  
H -3.086743 -3.569984 -0.016587  
H -6.171840 0.319115 0.066616  
C -1.809803 -1.210692 -0.027884  
O -0.902047 -2.098544 -0.050404  
N -3.552704 0.970159 0.020213  
C -4.431978 2.130125 0.044176  
H -5.084433 2.143523 -0.834672  
H -5.046978 2.135023 0.949822  
H -3.820657 3.032858 0.035723

**26**, Enaminone\_PdChromOC3OAc\_pi:

E(wB97XD/6-31G(d)&LANL2DZ) = -1400.64435781  
ZPE(wB97XD/6-31G(d)&LANL2DZ) = 0.29417  
H(wB97XD/6-31G(d)&LANL2DZ) = -1400.313863  
G(wB97XD/6-31G(d)&LANL2DZ) = -1400.41551

Pd 1.055573 0.597089 -0.109359  
C -0.754969 -0.090782 0.147800  
C -1.254184 -0.308375 1.384929  
C -3.316296 -1.174395 0.559194  
C -2.849014 -0.991821 -0.758412  
O 2.149051 -1.209924 0.196459  
C 3.243688 -0.618619 -0.038012  
O 3.333636 0.600540 -0.295302  
C 4.520318 -1.474757 0.040867  
H -0.681709 -0.071900 2.275975  
H 1.098475 2.638217 -1.748759  
C 0.336064 2.655712 -0.973934  
C 0.692713 2.894687 0.371151  
H 1.736231 3.044844 0.636778  
C -1.640943 3.119876 0.949811  
C -1.998570 2.882549 -0.389511  
C -1.028036 2.656134 -1.342868  
F 4.823567 -1.704724 1.328002  
F 5.555075 -0.858805 -0.527577  
F 4.344330 -2.652653 -0.561935  
C -0.314600 3.125715 1.331543  
H -1.296254 2.458084 -2.373527  
H -3.046490 2.874730 -0.672399

H -2.417000 3.303772 1.686907  
H -0.035013 3.327180 2.360688  
C -3.675276 -1.340189 -1.836382  
C -4.604904 -1.705641 0.764909  
C -4.937234 -1.858853 -1.629690  
H -5.568096 -2.127840 -2.470714  
C -5.395808 -2.039600 -0.318229  
H -6.385401 -2.450978 -0.142350  
H -3.273808 -1.186346 -2.832768  
H -4.986502 -1.859694 1.767583  
C -1.508276 -0.432925 -1.042150  
O -1.100954 -0.260828 -2.192507  
N -2.501117 -0.829260 1.626264  
C -2.946588 -1.038013 2.993041  
H -3.853241 -0.460518 3.202912  
H -3.146796 -2.098013 3.180904  
H -2.162035 -0.709684 3.675479

**TS-18**, Enaminone\_PdChromOC2OAc\_CMD\_opt:  
E(wB97XD/6-31G(d)&LANL2DZ) = -1400.59330551  
ZPE(wB97XD/6-31G(d)&LANL2DZ) = 0.287876  
H(wB97XD/6-31G(d)&LANL2DZ) = -1400.269537  
G(wB97XD/6-31G(d)&LANL2DZ) = -1400.371076

Pd 0.707878 -0.570304 -0.554845  
C -1.226925 -0.645399 -0.234983  
C -1.551775 -1.723102 0.534503  
C -3.920361 -1.132322 0.265679  
C -3.519000 -0.009357 -0.481252  
O 2.842157 -0.806660 -0.820377  
C 3.547102 -0.403600 0.126603  
O 3.171661 0.256126 1.132273  
C 5.061912 -0.686769 0.034530  
H -0.779665 -2.314929 1.019989  
H 1.929567 0.623778 0.917884  
C 0.793647 1.235109 0.542026  
C -0.150267 1.440711 1.574038  
H -0.434317 0.607057 2.208072  
C -0.346712 3.764102 0.972702  
C 0.592241 3.596658 -0.046108  
C 1.151075 2.344355 -0.260033  
F 5.650733 0.333967 -0.605947  
F 5.301258 -1.805011 -0.647309  
F 5.610248 -0.799322 1.242158  
C -0.713460 2.691536 1.786777  
H 1.902486 2.215554 -1.035316  
H 0.885877 4.441410 -0.661665  
H -0.788858 4.742037 1.141189  
H -1.438581 2.834840 2.581672  
C -2.932385 -2.105505 0.787883  
O -3.259454 -3.103981 1.419988  
C -4.496936 0.898051 -0.929514

C -5.277934 -1.332239 0.541991  
C -5.832390 0.677754 -0.639998  
H -6.571712 1.392232 -0.990056  
C -6.235130 -0.441863 0.095448  
H -7.285805 -0.605292 0.312171  
H -4.218390 1.781695 -1.490739  
H -5.538151 -2.213896 1.119195  
N -2.166305 0.187415 -0.775288  
C -1.792265 1.252376 -1.692849  
H -1.928995 2.236032 -1.230809  
H -0.741815 1.137911 -1.952886  
H -2.387584 1.190093 -2.608683

**25, Enaminone\_PdChromOC2OAc\_pi:**

E(wB97XD/6-31G(d)&LANL2DZ) = -1400.64457476  
ZPE(wB97XD/6-31G(d)&LANL2DZ) = 0.29323  
H(wB97XD/6-31G(d)&LANL2DZ) = -1400.314838  
G(wB97XD/6-31G(d)&LANL2DZ) = -1400.416624

Pd 1.016332 0.545666 -0.098415  
C -0.745815 -0.185536 0.324111  
C -1.283423 0.147543 1.522215  
C -3.372361 -0.924754 0.788904  
C -2.731755 -1.284387 -0.411017  
O 3.282687 0.713154 -0.302140  
C 3.296964 -0.473134 0.087135  
O 2.249068 -1.133718 0.358841  
C 4.639411 -1.199910 0.281301  
H -0.726713 0.744104 2.235448  
H 0.793788 2.057427 -2.294316  
C 0.065372 2.241369 -1.508242  
C 0.465498 2.872099 -0.309764  
H 1.506232 3.153400 -0.167248  
C -1.847009 3.079685 0.353712  
C -2.248863 2.459718 -0.841454  
C -1.309144 2.049158 -1.765331  
F 5.649229 -0.492360 -0.218724  
F 4.614966 -2.391584 -0.324044  
F 4.861801 -1.395046 1.586238  
C -0.508053 3.294091 0.616037  
H -1.619628 1.583621 -2.695242  
H -3.304504 2.295484 -1.031626  
H -2.596072 3.382898 1.077663  
H -0.197301 3.783801 1.532801  
C -2.654431 -0.190827 1.857992  
O -3.197515 0.136607 2.909037  
C -3.463817 -1.967624 -1.400374  
C -4.718712 -1.255708 0.980728  
C -4.794718 -2.280436 -1.184625  
H -5.344126 -2.804991 -1.961001  
C -5.433673 -1.929377 0.009159  
H -6.477224 -2.181729 0.166903

H -3.003231 -2.245917 -2.340510  
H -5.168520 -0.960322 1.923278  
N -1.392080 -0.945731 -0.613024  
C -0.707549 -1.425086 -1.804335  
H -1.078476 -0.923568 -2.706064  
H 0.361798 -1.239037 -1.707931  
H -0.848139 -2.504443 -1.907948

**TS-16, Enaminone\_PdOTFA2\_CMD\_C3\_opt:**

E(wB97XD/6-31G(d)&LANL2DZ) = -1695.10788623  
ZPE(wB97XD/6-31G(d)&LANL2DZ) = 0.227252  
H(wB97XD/6-31G(d)&LANL2DZ) = -1694.823973  
G(wB97XD/6-31G(d)&LANL2DZ) = -1694.930983

Pd 0.994076 0.526195 -0.092512  
O 0.276844 2.432506 -0.292422  
C -0.718919 2.829869 0.349724  
O -1.452832 2.167418 1.125384  
C -1.071031 4.326141 0.214123  
H -1.131554 0.927033 0.945817  
C -0.842449 -0.236828 0.387828  
C -0.790612 -1.265789 1.324844  
H -0.034815 -1.247005 2.103944  
C -2.617682 -2.472097 0.385708  
C -2.729623 -1.517673 -0.637608  
C -3.715972 -1.673034 -1.614585  
H -3.769645 -0.917223 -2.391112  
C -3.493609 -3.563614 0.422099  
H -3.425609 -4.313546 1.200806  
C -4.468687 -3.692575 -0.555981  
H -5.145383 -4.540492 -0.518785  
C -4.586255 -2.748824 -1.578146  
H -5.354653 -2.857977 -2.336263  
C -1.811917 -0.349359 -0.717385  
O -1.894866 0.465773 -1.623007  
F -0.717778 4.957395 1.341290  
F -2.383456 4.477830 0.038747  
F -0.434907 4.890219 -0.805279  
C 3.138140 -0.706373 -0.230144  
O 2.033104 -1.249639 0.101610  
O 3.233324 0.500170 -0.512248  
C 4.368933 -1.625943 -0.265770  
F 4.205620 -2.571424 -1.198341  
F 5.475232 -0.944293 -0.538734  
F 4.519970 -2.230892 0.919586  
N -1.613481 -2.315126 1.366572  
C -1.467997 -3.317874 2.418085  
H -2.377488 -3.369628 3.022604  
H -1.262832 -4.296618 1.977133  
H -0.631794 -3.039144 3.058701

**24, Enaminone\_PdOTFA2\_CMD\_C2\_prod:**

E(wB97XD/6-31G(d)&LANL2DZ) = -1695.13274442  
ZPE(wB97XD/6-31G(d)&LANL2DZ) = 0.23354  
H(wB97XD/6-31G(d)&LANL2DZ) = -1694.850468  
G(wB97XD/6-31G(d)&LANL2DZ) = -1694.960231

Pd 1.106173 0.546604 -0.137412  
O -0.172998 2.066688 -0.375847  
C -1.300095 2.053961 0.286311  
O -1.195559 1.991733 1.674021  
C -2.170010 3.272158 -0.115181  
H -0.312750 2.327177 1.880979  
C -0.415109 -0.672336 -0.007050  
C -0.138545 -2.025257 0.027143  
H 0.893475 -2.361606 0.044517  
C -2.415577 -2.673056 -0.009190  
C -2.780903 -1.309906 -0.035478  
C -4.150801 -0.962372 -0.062197  
H -4.410348 0.089762 -0.069386  
C -3.417467 -3.665918 -0.017954  
H -3.156985 -4.716964 0.000944  
C -4.742708 -3.295052 -0.051421  
H -5.507826 -4.064643 -0.058773  
C -5.116704 -1.938259 -0.072058  
H -6.166721 -1.667115 -0.092597  
C -1.761478 -0.297697 -0.022370  
O -2.211422 0.932950 -0.038794  
F -1.548870 4.396936 0.251217  
F -3.365138 3.240465 0.488672  
F -2.375599 3.309976 -1.433471  
C 3.562853 -0.028628 -0.059566  
O 2.621471 -0.884814 0.020435  
O 3.368873 1.187186 -0.194307  
C 4.988451 -0.596329 0.035659  
F 5.907117 0.355225 -0.091924  
F 5.161789 -1.197993 1.220896  
F 5.186597 -1.510579 -0.923967  
N -1.072720 -2.997423 0.032589  
C -0.653540 -4.398113 0.076185  
H -1.055884 -4.883379 0.968743  
H -0.998455 -4.923220 -0.817966  
H 0.434367 -4.437218 0.112500

**TS-15**, Enaminone\_PdOTFA2\_CMD\_C2\_opt:  
E(wB97XD/6-31G(d)&LANL2DZ) = -1695.08776723  
ZPE(wB97XD/6-31G(d)&LANL2DZ) = 0.226232  
H(wB97XD/6-31G(d)&LANL2DZ) = -1694.823973  
G(wB97XD/6-31G(d)&LANL2DZ) = -1694.930983

Pd -0.683105 0.707871 0.158956  
O -2.589092 0.020202 0.395899  
C -2.952627 -1.000739 -0.239009  
O -2.222348 -1.784545 -0.889522

C -4.467115 -1.295228 -0.184213  
H -1.011677 -1.445384 -0.579343  
C 0.202098 -1.188856 -0.077459  
C 0.322092 -1.791353 1.147266  
H -0.506316 -1.765303 1.848024  
C 2.626374 -2.418310 0.567572  
C 2.447400 -1.780879 -0.679279  
C 3.527217 -1.739665 -1.583998  
H 3.427339 -1.241732 -2.540466  
C 3.863642 -3.000212 0.879659  
H 3.954626 -3.480654 1.848393  
C 4.913684 -2.958923 -0.013146  
H 5.867925 -3.411778 0.234270  
C 4.734878 -2.320211 -1.247660  
H 5.555979 -2.272918 -1.956635  
C 1.538618 -2.491865 1.558821  
O 1.640722 -3.054587 2.641790  
F -4.838398 -1.460346 1.085278  
F -5.135676 -0.263399 -0.699852  
F -4.770819 -2.390502 -0.868462  
C 0.462627 2.864255 0.134154  
O 1.065940 1.764258 -0.076530  
O -0.769820 2.892768 0.343364  
C 1.285820 4.160098 0.169209  
F 0.595455 5.161218 -0.371093  
F 1.565618 4.466995 1.439052  
F 2.428303 4.011334 -0.497268  
N 1.222929 -1.212853 -1.002376  
C 1.015967 -0.618827 -2.316046  
H 1.606550 0.295952 -2.426817  
H 1.280198 -1.331352 -3.102492  
H -0.039908 -0.367073 -2.424419

**23**, Enaminone\_PdOTFA2\_CMD\_C3\_prod:  
E(wB97XD/6-31G(d)&LANL2DZ) = -1695.11995025  
ZPE(wB97XD/6-31G(d)&LANL2DZ) = 0.231186  
H(wB97XD/6-31G(d)&LANL2DZ) = -1694.850468  
G(wB97XD/6-31G(d)&LANL2DZ) = -1694.960231

Pd 1.037119 0.370855 0.094327  
O 0.054666 2.235081 -0.143497  
C -1.064784 2.703097 0.019915  
O -2.117295 2.121540 0.492364  
C -1.335797 4.172299 -0.368446  
H -1.918988 1.174203 0.770771  
C -0.635157 -0.633133 0.267403  
C -1.308923 -0.486711 1.455509  
H -0.848774 0.051779 2.280167  
C -3.029423 -2.023591 0.598353  
C -2.310571 -2.099578 -0.607364  
C -2.824392 -2.874364 -1.661238  
H -2.300424 -2.953230 -2.605368

C -4.234294 -2.721102 0.734663  
H -4.748665 -2.634655 1.686248  
C -4.736681 -3.481898 -0.303419  
H -5.674273 -4.016411 -0.192251  
C -4.022058 -3.551789 -1.502491  
H -4.403344 -4.144487 -2.328500  
C -2.535992 -1.221433 1.742194  
O -3.122301 -1.166841 2.814972  
F -0.241092 4.730172 -0.860962  
F -2.301215 4.212781 -1.287250  
F -1.731714 4.850659 0.706790  
C 3.354900 -0.539689 0.121541  
O 2.299885 -1.258228 0.159575  
O 3.322815 0.700252 0.069871  
C 4.690819 -1.300610 0.106163  
F 4.714828 -2.223589 1.069472  
F 4.833582 -1.918559 -1.074246  
F 5.715944 -0.473393 0.278462  
N -1.097174 -1.400653 -0.751393  
C -0.354013 -1.547230 -2.000015  
H -0.929272 -1.144227 -2.839080  
H 0.588618 -1.008606 -1.925165  
H -0.129087 -2.601803 -2.179405

**22-1**, Enaminone\_PdOTFA2\_COlp:

E(wB97XD/6-31G(d)&LANL2DZ) = -1695.14383934  
ZPE(wB97XD/6-31G(d)&LANL2DZ) = 0.232649  
H(wB97XD/6-31G(d)&LANL2DZ) = -1694.873276  
G(wB97XD/6-31G(d)&LANL2DZ) = -1694.981614

Pd 1.325929 0.376822 -0.455849  
C 3.585454 -0.458058 -0.154422  
O 2.695873 -1.227335 -0.614750  
O 3.319735 0.736049 0.141773  
C 5.003817 -0.992363 0.087359  
C -1.590679 -2.837317 1.088725  
C -0.710612 -2.023412 0.440009  
H -1.241283 -3.572931 1.803978  
H 0.350929 -2.107300 0.638690  
C -3.480067 -1.884790 0.013304  
C -2.626255 -1.015190 -0.695350  
C -1.189769 -1.069062 -0.492670  
O -0.457033 -0.280787 -1.164621  
C -3.176231 -0.056415 -1.565503  
C -4.871579 -1.798410 -0.182803  
C -5.381907 -0.857574 -1.054124  
H -6.456668 -0.795864 -1.193785  
C -4.538120 0.023699 -1.747693  
H -4.958334 0.768551 -2.414645  
H -2.494524 0.619601 -2.068548  
H -5.549243 -2.455733 0.348096  
F 5.209027 -2.119872 -0.588519

F 5.163402 -1.242646 1.392598  
F 5.911230 -0.092047 -0.285642  
C -0.574386 2.053266 0.697911  
O 0.382021 2.105866 -0.165174  
O -0.889197 1.140036 1.439036  
C -1.434468 3.338044 0.672217  
F -2.106322 3.489807 1.813772  
F -0.711625 4.440247 0.462901  
F -2.334868 3.236852 -0.325480  
N -2.930536 -2.800130 0.902148  
C -3.796500 -3.692489 1.664998  
H -4.469766 -3.114285 2.303844  
H -4.382664 -4.324686 0.992565  
H -3.178417 -4.331549 2.295288

**22**, Enaminone\_PdOTFA2\_pi:

E(wB97XD/6-31G(d)&LANL2DZ) = -1695.14458929  
ZPE(wB97XD/6-31G(d)&LANL2DZ) = 0.232472  
H(wB97XD/6-31G(d)&LANL2DZ) = -1694.874269  
G(wB97XD/6-31G(d)&LANL2DZ) = -1694.981252

Pd 1.042408 -0.146665 -0.360651  
C 3.466238 0.193959 -0.090932  
O 2.905820 -0.947060 0.014584  
O 2.813979 1.224327 -0.343394  
C 4.985987 0.248481 0.125581  
C -0.176801 -1.829852 1.056386  
C 0.009490 -2.008255 -0.334983  
H 0.642506 -2.027406 1.740512  
H 0.828321 -2.652721 -0.648626  
C -2.471586 -1.237837 0.808982  
C -2.427944 -1.527363 -0.565670  
C -1.185269 -2.010809 -1.213461  
O -1.141760 -2.384764 -2.369876  
C -3.567216 -1.335406 -1.346490  
C -3.644352 -0.729922 1.373050  
C -4.761708 -0.533041 0.573280  
H -5.661212 -0.121891 1.019464  
C -4.732948 -0.841251 -0.785859  
H -5.609737 -0.674258 -1.402069  
H -3.494011 -1.564208 -2.404189  
H -3.692674 -0.462835 2.420660  
F 5.595430 -0.624944 -0.679672  
F 5.266066 -0.079142 1.392924  
F 5.461645 1.463338 -0.117383  
C -1.156619 1.493706 0.195162  
O -0.596825 0.916703 -0.808945  
O -0.848750 1.424407 1.374014  
C -2.354722 2.377042 -0.226095  
F -2.996451 1.885241 -1.289121  
F -3.233402 2.480966 0.776362  
F -1.923628 3.607735 -0.530512



N -1.322873 -1.457302 1.610257  
C -1.355504 -1.093736 3.025648  
H -1.505085 -0.014581 3.109029  
H -2.149833 -1.643558 3.534958  
H -0.397856 -1.352781 3.476392

**TS-19**, Enaminone\_PdPhOAc\_CMD\_C3\_RETs\_opt:

E(wB97XD/6-31G(d)&LANL2DZ) = -1400.62313  
ZPE(wB97XD/6-31G(d)&LANL2DZ) = 0.292732  
H(wB97XD/6-31G(d)&LANL2DZ) = -1400.295009  
G(wB97XD/6-31G(d)&LANL2DZ) = -1400.394673

|    |            |            |            |
|----|------------|------------|------------|
| Pd | 1.5865866  | -1.7312091 | 0.3571715  |
| C  | -0.3521074 | -2.2423481 | 0.2741495  |
| C  | -0.8869214 | -2.9114041 | 1.3890495  |
| C  | -1.8824764 | -3.8691081 | 1.2307195  |
| C  | -2.3803104 | -4.1641331 | -0.0375775 |
| C  | -1.8679014 | -3.4976391 | -1.1471405 |
| C  | -0.8647204 | -2.5429681 | -0.9985095 |
| O  | 3.7122726  | -1.2841091 | -0.1769535 |
| C  | 3.9581976  | -0.7470131 | -1.2457345 |
| O  | 3.1465076  | -0.2282501 | -2.1081875 |
| C  | 5.4235996  | -0.6121001 | -1.7092815 |
| H  | -0.5166304 | -2.6913631 | 2.3876085  |
| H  | -2.2703104 | -4.3894391 | 2.1025075  |
| H  | -3.1636064 | -4.9066580 | -0.1575575 |
| H  | -2.2505644 | -3.7205401 | -2.1394665 |
| H  | -0.4848374 | -2.0092191 | -1.8638015 |
| H  | 2.1572786  | -0.2291191 | -1.8537105 |
| C  | 0.1066236  | -0.3312931 | 0.4647685  |
| C  | -0.3903744 | 0.1735069  | 1.6369765  |
| H  | -0.3854794 | -0.4261821 | 2.5397605  |
| C  | -1.1039394 | 2.2358759  | 0.6946135  |
| C  | -0.6048694 | 1.8108659  | -0.5531135 |
| C  | -0.7359964 | 2.6574349  | -1.6687135 |
| H  | -0.3293964 | 2.3046989  | -2.6101125 |
| C  | -1.7319934 | 3.4934679  | 0.8008585  |
| H  | -2.1261784 | 3.8371729  | 1.7497235  |
| C  | -1.8536424 | 4.2958019  | -0.3149805 |
| H  | -2.3425394 | 5.2607199  | -0.2210315 |
| C  | -1.3552794 | 3.8829009  | -1.5605895 |
| H  | -1.4556514 | 4.5270789  | -2.4277555 |
| C  | 0.0818806  | 0.5274939  | -0.6982985 |
| O  | 0.6244346  | 0.2284209  | -1.7892135 |
| F  | 5.7553186  | 0.6801329  | -1.7958145 |
| F  | 5.5811976  | -1.1717841 | -2.9116945 |
| F  | 6.2455036  | -1.2056711 | -0.8519225 |
| N  | -0.9578714 | 1.4039700  | 1.7889275  |
| C  | -1.4329754 | 1.8226549  | 3.0998445  |
| H  | -0.9385754 | 2.7481739  | 3.4097005  |
| H  | -2.5165174 | 1.9768019  | 3.0889725  |
| H  | -1.1977354 | 1.0443759  | 3.8258095  |

**29(C3)**, Enaminone\_PdPhOAc\_CMD\_C3\_RETs\_prod:

E(wB97XD/6-31G(d)&LANL2DZ) = -1400.66988233  
ZPE(wB97XD/6-31G(d)&LANL2DZ) = 0.294551  
H(wB97XD/6-31G(d)&LANL2DZ) = -1400.338997  
G(wB97XD/6-31G(d)&LANL2DZ) = -1400.443443

|    |           |           |           |
|----|-----------|-----------|-----------|
| Pd | -0.154692 | -0.995594 | 0.229458  |
| C  | -3.076545 | -0.495584 | -0.055941 |
| C  | -4.050307 | -0.451528 | 0.946964  |
| C  | -5.202759 | -1.227048 | 0.858205  |
| C  | -5.406904 | -2.048152 | -0.245666 |
| C  | -4.453287 | -2.083419 | -1.261399 |
| C  | -3.299407 | -1.314843 | -1.171008 |
| O  | 1.856294  | -2.006729 | 0.159596  |
| C  | 2.755907  | -1.234681 | -0.115384 |
| O  | 2.633725  | 0.040933  | -0.375667 |
| C  | 4.223176  | -1.695349 | -0.177874 |
| H  | -3.920747 | 0.214893  | 1.795767  |
| H  | -5.947558 | -1.177390 | 1.647144  |
| H  | -6.308163 | -2.649423 | -0.320510 |
| H  | -4.609077 | -2.713804 | -2.131943 |
| H  | -2.564513 | -1.335289 | -1.967264 |
| H  | 1.662664  | 0.266191  | -0.320037 |
| C  | -1.835722 | 0.325221  | 0.053974  |
| C  | -1.254581 | 0.564984  | 1.315160  |
| H  | -1.675727 | 0.082142  | 2.192265  |
| C  | 0.032888  | 2.450284  | 0.588963  |
| C  | -0.410927 | 2.231517  | -0.733098 |
| C  | 0.087358  | 3.032252  | -1.767879 |
| H  | -0.296500 | 2.843389  | -2.765083 |
| C  | 0.996833  | 3.446914  | 0.829918  |
| H  | 1.372260  | 3.622794  | 1.830928  |
| C  | 1.481389  | 4.213241  | -0.216200 |
| H  | 2.226518  | 4.975576  | -0.009052 |
| C  | 1.027994  | 4.015068  | -1.524080 |
| H  | 1.413289  | 4.623183  | -2.335823 |
| C  | -1.434531 | 1.204297  | -1.069180 |
| O  | -1.900713 | 1.115460  | -2.197401 |
| F  | 4.937661  | -1.034863 | 0.737034  |
| F  | 4.729232  | -1.439052 | -1.384550 |
| F  | 4.311229  | -2.995289 | 0.062038  |
| N  | -0.468214 | 1.666461  | 1.616778  |
| C  | 0.112440  | 1.750898  | 2.944447  |
| H  | 1.176806  | 1.483172  | 2.933964  |
| H  | 0.000408  | 2.759895  | 3.351446  |
| H  | -0.411969 | 1.057881  | 3.603234  |

**TS-20**, Enaminone\_PdPhOAc\_CMD\_C2\_RETs\_opt:

E(wB97XD/6-31G(d)&LANL2DZ) = -1400.6075561  
ZPE(wB97XD/6-31G(d)&LANL2DZ) = 0.292327  
H(wB97XD/6-31G(d)&LANL2DZ) = -1400.279521

G(wB97XD/6-31G(d)&LANL2DZ) = -1400.38021

Pd 0.311160 -1.634434 -0.312354  
C -1.684611 -1.832674 0.062665  
C -1.941018 -2.401580 1.322797  
C -3.042068 -3.224284 1.525338  
C -3.932068 -3.473051 0.482474  
C -3.703949 -2.902019 -0.764829  
C -2.591216 -2.090767 -0.976152  
O 2.502006 -1.201207 -0.462694  
C 2.981942 -0.215421 0.068516  
O 2.374738 0.697468 0.770477  
C 4.489963 0.084519 -0.056283  
H -1.282172 -2.193857 2.159983  
H -3.211585 -3.662077 2.504568  
H -4.802244 -4.101702 0.645070  
H -4.393404 -3.087831 -1.583364  
H -2.440970 -1.666757 -1.961056  
H 1.399907 0.519363 0.866142  
C -0.849312 -0.031738 0.122328  
C -0.679281 0.453915 1.403967  
H -0.477218 -0.234452 2.216475  
C -1.410157 2.680077 0.670996  
C -1.539352 2.160718 -0.628488  
C -1.998313 3.009327 -1.652996  
H -2.120235 2.644940 -2.665409  
C -1.737088 4.015320 0.927130  
H -1.614934 4.364644 1.947420  
C -2.187092 4.844521 -0.082640  
H -2.433968 5.881398 0.120924  
C -2.316830 4.328084 -1.375049  
H -2.673194 4.963663 -2.180441  
C -0.928132 1.830409 1.781981  
O -0.766896 2.262080 2.920274  
F 5.095970 -0.876141 -0.740474  
F 4.664004 1.245890 -0.690655  
F 5.039861 0.169547 1.155212  
N -1.200401 0.826809 -0.898390  
C -1.073994 0.438103 -2.296434  
H -2.045553 0.436428 -2.801639  
H -0.403209 1.129480 -2.816470  
H -0.633599 -0.558101 -2.348326

**30(C2)**, Enaminone\_PdPhOAc\_CMD\_C2\_RETS\_prod:  
E(wB97XD/6-31G(d)&LANL2DZ) = -1400.67772195

ZPE(wB97XD/6-31G(d)&LANL2DZ) = 0.293787  
H(wB97XD/6-31G(d)&LANL2DZ) = -1400.34813  
G(wB97XD/6-31G(d)&LANL2DZ) = -1400.449356

Pd -0.352332 0.502642 -0.788209  
C 2.388591 1.671178 0.271334  
C 3.717432 1.669121 0.713266  
C 4.392939 2.864211 0.929323  
C 3.750477 4.080990 0.709510  
C 2.428578 4.092870 0.275169  
C 1.753030 2.895533 0.055623  
O -2.604706 0.379446 -0.870713  
C -3.344856 0.152594 0.072413  
O -3.084583 -0.358917 1.230877  
C -4.843381 0.509805 -0.040487  
H 4.215232 0.721055 0.897544  
H 5.421584 2.845760 1.277159  
H 4.277685 5.015234 0.877306  
H 1.920330 5.036295 0.100591  
H 0.721588 2.902601 -0.289866  
H -2.140919 -0.729905 1.392863  
C 1.666296 0.367637 0.107309  
C 0.613892 0.053887 1.002146  
H 0.302187 0.782823 1.746052  
C 1.030613 -2.347318 0.613932  
C 2.132232 -1.995118 -0.198660  
C 2.922020 -3.031014 -0.739898  
H 3.777095 -2.799364 -1.363510  
C 0.750251 -3.697553 0.872994  
H -0.112293 -3.917078 1.493588  
C 1.541136 -4.699756 0.351870  
H 1.323176 -5.742031 0.559248  
C 2.630243 -4.352004 -0.458562  
H 3.263614 -5.129730 -0.875421  
C 0.155316 -1.313480 1.162551  
O -0.904313 -1.598098 1.764286  
F -5.111925 1.049942 -1.224553  
F -5.593349 -0.585492 0.109157  
F -5.177459 1.385908 0.912829  
N 2.415654 -0.671323 -0.477934  
C 3.253463 -0.359753 -1.631140  
H 2.927356 -0.939622 -2.500903  
H 3.155381 0.699142 -1.863709  
H 4.309448 -0.571130 -1.432433

### 3. REFERENCES

- 
- (1) For recent examples see: (a) Y.-F. Yang, G.-J. Cheng, P. Liu, D. Leow, T.-Y. Sun, P. Chen, X. Zhang, J.-Q. Yu, Y.-D. Wu and K. N. Houk, *J. Am. Chem. Soc.* 2014, **136**, 344; (b) G.-J. Cheng, Y.-F. Yang, P. Liu, P. Chen, T.-Y. Sun, G. Li, X. Zhang, K. N. Houk, J.-Q. Yu, Y.-D. Wu, *J. Am. Chem. Soc.* 2014, **136**, 894; (c) M. Anand, R. B. Sunoj, H. F. Schaefer III, *J. Am. Chem. Soc.* 2014, **136**, 5535.
- (2) (a) R. Meir, S. Kozuch, A. Uhe, S. Shaik, *Chem.–Eur. J.* 2011, **17**, 7623; (b) M. Wakioka, Y. Nakamura, Y. Hihara, F. Ozawa, S. Sakaki, *Organometallics* 2013, **32**, 4423–4430.
- (3) *Gaussian 09, Revision D.01*, M. J. Frisch et al. Gaussian, Inc., Wallingford CT, 2009.
- (4) J.-D. Chai and M. Head-Gordon, *Phys. Chem. Chem. Phys.* 2008, **10**, 6615.
- (5) J. Hay and W. R. Wadt, *J. Chem. Phys.* 1985, **82**, 270.
- (6) M. Chen, R. Craciun, N. Hoffman and D. A. Dixon, *Inorg. Chem.* 2012, **51**, 13195.
- (7) I. A. Sanhueza, A. M. Wagner, M. S. Sanford and F. Schoenebeck, *Chem. Sci.* **2013**, *4*, 2767.
- (8) (a) F. Weigend and R. Ahlrichs, *Phys. Chem. Chem. Phys.* 2005, **7**, 3297; (b) F. Weigend, *Phys. Chem. Chem. Phys.* 2006, **8**, 1057.
- (9) (a) Barone, V.; Cossi, M. *J. Phys. Chem. A* **1998**, *102*, 1995; (b) Cossi, M.; Rega, N.; Scalmani, G.; Barone, V. *J. Comput. Chem.* **2003**, *24*, 669; (c) solute cavities were defined by UFF atomic radii: Y. Takano, K. N. Houk. *J. Chem. Theory. Comput.* **2005**, *1*, 70.
- (10) (a) Becke, A.D. *J. Chem. Phys.* **1993**, *98*, 5648; (b) Lee, C.; Yang, W.; Parr, R. G. *Phys. Rev. B* **1988**, *37*, 785; (c) Vosko, S. H.; Wilk, L.; Nusair, M. *Can. J. Phys.* **1980**, *58*, 1200-1211; (d) Stephens, P. J.; Devlin, F. J.; Chabalowski, C. F.; Frisch, M. J. *J. Phys. Chem.* **1994**, *98*, 11623.
- (11) Grimme, S.; Antony, J.; Ehrlich, S.; Krieg, H. *J. Chem. Phys.* **2010**, *132*, 154104-154114
- (12) Grimme, S.; Ehrlich, S.; Georigk, L. *J. Comp. Chem.* **2011**, *32*, 1456-1465
- (13) Grimme, S. *Chem. Eur. J.* **2012**, *18*, 9955–9964.
- (14) Mammen, M.; Shakhnovich, E. I.; Deutch, J. M.; Whitesides, G. M. *J. Org. Chem.* **1998**, *63*, 3821.
- (15) The PyMOL Molecular Graphics System, Version 1.5.0.4 Schrödinger, LLC.
- (16) Hay, P. J.; Wadt, W. R. *J. Chem. Phys.*, **1985**, *82*, 270-83.
